# Supplementary material for: Antibacterial and Antitubercular Activities of Cinnamylideneacetophenones
Source: PubMed Central journal article supplement (PMC6151560; doi:10.3390/molecules22101685), 2017-10-10
Supplement: molecules-22-01685-s001.pdf [file molecules-22-01685-s001.pdf]

## Antibacterial and Antitubercular Activities of Cinnamylideneacetophenones

Carlos R. Polaquini<sup>a,†</sup>, Guilherme S. Torrezan<sup>a,†</sup>, Vanessa R. Santos<sup>b</sup>, Ana C. Nazaré<sup>a</sup>,  
Débora L. Campos<sup>c</sup>, Laíza A. Almeida<sup>a</sup>, Isabel C. Silva<sup>c</sup>, Henrique Ferreira<sup>d</sup>, Fernando  
R. Pavan<sup>c</sup>, Cristiane Duque<sup>b</sup> and Luis O. Regasini<sup>a,\*</sup>

<sup>a</sup>Laboratory of Green and Medicinal Chemistry, Department of Chemistry and  
Environmental Sciences, Institute of Biosciences, Humanities and Exact Sciences, São  
Paulo State University (Unesp), São José do Rio Preto, SP, Brazil

<sup>b</sup>Department of Pediatric Dentistry and Public Health, Araçatuba Dental School, São  
Paulo State University (Unesp), Araçatuba, SP, Brazil

<sup>c</sup>Department of Biological Sciences, School of Pharmaceutical Sciences, São Paulo  
State University (Unesp), Araraquara, SP, Brazil

<sup>d</sup>Department of Biochemistry and Microbiology, Institute of Biosciences, São Paulo  
State University (Unesp), Rio Claro, SP, Brazil

\* Corresponding author. Tel.: +55 17 3221-2362.

E-mail address: regasini@ibilce.unesp.br (L.O. Regasini).

<sup>†</sup> These two authors contributed equally to this work.

26 **1. SPECTROSCOPY DATA ANALYSES**

27 Melting points of the cinnamylideneacetophenones were determined on a capillary  
28 point apparatus with a digital thermometer. UV-Vis spectrum and purity of compounds  
29 were recorded on HPLC-PAD analyses performed for calculations of partition  
30 coefficient, using MeOH:H<sub>2</sub>O (3:1) as mobile phase. <sup>1</sup>H NMR and <sup>13</sup>C NMR spectra  
31 were recorded on a Bruker Avance III 14.1 T (600 MHz), Bruker Avance III 9.4 T (400  
32 MHz) and Bruker Fourier 7.1 T (300 MHz) spectrometers. Compounds were solubilized  
33 in deuterated chloroform (CDCl<sub>3</sub>). The chemical shifts ( $\delta$ ) and coupling constants ( $J$ )  
34 were expressed in ppm and Hz, respectively. Multiplicities were reported as singlet (s),  
35 doublet (d), doublet of doublet (dd), doublet of doublet of doublets (ddd) and multiplet  
36 (m).

37

38 1.1. (*2E,4E*)-1,5-diphenylpenta-2,4-dien-1-one (**2**)

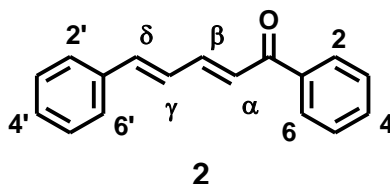

39

40 Pale yellow crystal

41 **Yield:** 33 %

42 **Purity:** 99.1%

43 **Melting point:** 99–102 °C

44 **UV-Vis:**  $\lambda_{\max}$  345 nm

45 **<sup>1</sup>H NMR (400 MHz):** 8.01 (d; 7.2; H-2 and H-6); 7.67–7.50 (H- $\beta$ , H-3, H-4, H-5, H-2'  
46 and H-6'), 7.42–7.35 (H-3', H-4' and H-5), 7.12 (d; 15.2; H- $\alpha$ ), 7.06–7.05 (H- $\gamma$  and H-  
47  $\delta$ ).

48 <sup>13</sup>C NMR (100 MHz): 190.6 (C=O), 144.9 (C-β), 142.0 (C-δ), 138.2 (C-1), 136.1 (C-  
49 1'), 132.7 (C-4), 129.2 (C-α), 128.9 (C-2 and C-6), 128.6 (C-3' and C-5'), 128.4 (C-3  
50 and C-5), 127.3 (C-2 and C-6), 126.7 (C-4'), 125.5 (C-γ).

51

52 1.2. (2E,4E)-1-(3-hydroxyphenyl)-5-phenylpenta-2,4-dien-1-one (3)

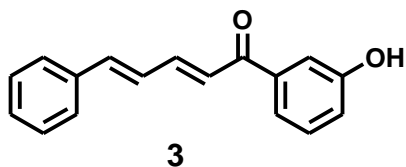

53

54 Brown crystal

55 **Yield:** 91 %

56 **Purity:** 98.4%

57 **Melting point:** 192–195 °C

58 **UV-Vis:** λ<sub>max</sub> 346 nm

59 <sup>1</sup>H NMR (600 MHz): 7.66–7.62 (m; H-β), 7.57 (dd; 1.8 and 1.8; H-2), 7.56 (d; 7.8; H-  
60 6), 7.53 (dd; 1.2 and 7.8; H-2' and H-6'), 7.42–7.36 (H-5, H-3', H-4' and H-5'), 7.12–  
61 7.11 (m; H-4), 7.10 (d; 1.5, H-α), 7.06–7.05 (H-γ and H-δ), 6.06 (s; 3-OH).

62 <sup>13</sup>C NMR (150 MHz): 190.8 (C=O), 156.5 (C-3), 145.5 (C-β), 142.5 (C-δ), 139.5 (C-  
63 1), 136.0 (C-1'), 129.9 (C-5), 129.4 (C-α), 128.9 (C-3' and C-5'), 127.4 (C-2' and C-  
64 6'), 126.8 (C-4'), 125.2 (C-γ), 120.9 (C-6), 120.4 (C-4), 115.1 (C-2).

65

66 1.3. (2E,4E)-1-(4-hydroxyphenyl)-5-phenylpenta-2,4-dien-1-one (4)

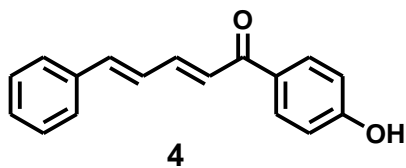

67

68 Yellow solid

69 **Yield:** 82 %

70 **Purity:** 96.7%

71 **Melting point:** 197–200 °C

72 **UV-Vis:**  $\lambda_{\max}$  350 nm

73  **$^1\text{H}$  NMR (600 MHz):** 7.98 (d; 8.4; H-2 and H-6), 7.65–7.61 (m; H- $\beta$ ), 7.52 (dd; 1.2 and  
74 7.8; H-2' and H-6'), 7.41–7.35 (H-3', H-4' and H-5'), 7.14 (d; 14.4; H- $\alpha$ ), 7.05–7.04  
75 (H- $\gamma$  and H- $\delta$ ), 6.97 (d; 8.4; H-3 and H-5).

76  **$^{13}\text{C}$  NMR (150 MHz):** 189.3 (C=O), 160.5 (C-4), 144.6 (C- $\beta$ ), 141.8 (C- $\delta$ ), 136.1 (C-  
77 1'), 131.1 (C-2 and C-6), 130.9 (C-1), 129.2 (C- $\alpha$ ), 128.9 (C-3' and C-5'), 127.3 (C-2'  
78 and C-6'), 127.0 (C-4'), 125.2 (C- $\gamma$ ), 115.6 (C-3 and C-5).

79

80 1.4. (2*E*,4*E*)-1-(3-aminophenyl)-5-phenylpenta-2,4-dien-1-one (**5**)

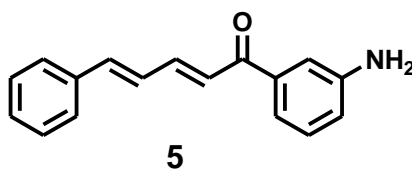

81

82 Yellow solid

83 **Yield:** 35 %

84 **Purity:** 99.8%

85 **Melting point:** 168–171 °C

86 **UV-Vis:**  $\lambda_{\max}$  343 nm

87  **$^1\text{H}$  NMR (600 MHz):** 7.62–7.58 (m; H- $\beta$ ), 7.52 (dd; 1.2 and 7.8; H-2' and H-6'), 7.41–  
88 7.33 (H-2, H-6, H-3', H-4' and H-5'), 7.29 (dd; 7.8 and 7.8; H-5), 7.07 (d; 15; H- $\alpha$ ),  
89 7.03–7.02 (H- $\gamma$  and H- $\delta$ ), 6.92 (ddd; 0.6, 2.4 and 7.8; H-4), 3.32 (s; 3-NH<sub>2</sub>).

90  **$^{13}\text{C}$  NMR (150 MHz):** 190.7 (C=O), 146.6 (C-3), 144.7 (C- $\beta$ ), 141.8 (C- $\delta$ ), 139.3 (C-  
91 1), 136.1 (C-1'), 129.4 (C-5), 129.2 (C- $\alpha$ ), 128.9 (C-3' and C-5'), 127.3 (C-2' and C-  
92 6'), 127.0 (C-4'), 125.7 (C- $\gamma$ ), 119.5 (C-4), 118.9 (C-6), 114.5 (C-2).

93

94 1.5. (2*E*,4*E*)-1-(3-methoxyphenyl)-5-phenylpenta-2,4-dien-1-one (**6**)

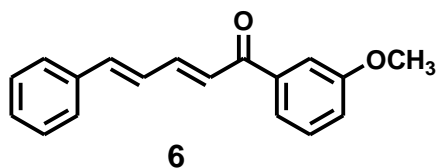

95

96 Yellow crystal

97 **Yield:** 78 %

98 **Purity:** 98.7%

99 **Melting point:** 84–87 °C

100 **UV-Vis:**  $\lambda_{\text{max}}$  349 nm

101 **<sup>1</sup>H NMR (600 MHz):** 7.66–7.61 (m; H- $\beta$ ), 7.58 (ddd; 1.2, 1.2 and 7.6; H-6), 7.54–7.53

102 (H-5, H-2' and H-6'), 7.44–7.34 (H-2, H-3', H-4' and H-5'), 7.15 (ddd; 1.2, 2.6 and 8.2;

103 H-4), 7.10 (d; 15; H- $\alpha$ ), 7.06–7.05 (H- $\gamma$  and H- $\delta$ ), 3.90 (s; 3-OCH<sub>3</sub>).

104 **<sup>13</sup>C NMR (150 MHz):** 190.2 (C=O), 159.9 (C-3), 144.9 (C- $\beta$ ), 142.0 (C- $\delta$ ), 139.6 (C-

105 1), 136.1 (C-1'), 129.6 (C-5), 129.3 (C- $\alpha$ ), 128.9 (C-3' and C-5'), 127.3 (C-2' and C-

106 6'), 126.7 (C-4'), 125.4 (C- $\gamma$ ), 121.0 (C-6), 119.3 (C-4), 112.6 (C-2), 55.5 (3-OCH<sub>3</sub>).

107

108 1.6. (2*E*,4*E*)-1-(4-methoxyphenyl)-5-phenylpenta-2,4-dien-1-one (**7**)

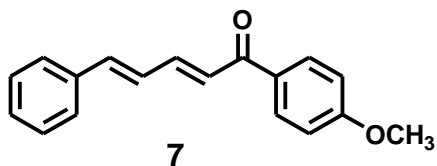

109

110 Yellow crystal

111 **Yield:** 35 %

112 **Purity:** 99.0%

113 **Melting point:** 91–93 °C

114 **UV-Vis:**  $\lambda_{\text{max}}$  349 nm

115 **<sup>1</sup>H NMR (400 MHz):** 8.02 (d; 9.0; H-2 and H-6), 7.65–7.59 (m; H-β), 7.52 (dd; 1.4 and  
116 8.2; H-2' and H-6'), 7.42–7.34 (H-3', H-4' and H-5'), 7.13 (d; 14.8; H-α), 7.05–7.03  
117 (H-γ and H-δ), 7.00 (d; 9.0; H-3 and H-5), 3.91 (s; 4-OCH<sub>3</sub>).

118 **<sup>13</sup>C NMR (100 MHz):** 188.7 (C=O), 163.3 (C-4), 144.0 (C-β), 141.4 (C-δ), 136.2 (C-  
119 1'), 131.5 (C-1), 130.7 (C-2 and C-6), 129.1 (C-α), 128.8 (C-3' and C-5'), 127.2 (C-2'  
120 and C-6'), 127.1 (C-4'), 125.3 (C-γ), 113.8 (C-3 and C-5), 55.5 (4-OCH<sub>3</sub>).

121

122 1.7. (2*E*,4*E*)-1-(3,4-methylenedioxy)-5-phenylpenta-2,4-dien-1-one (**8**)

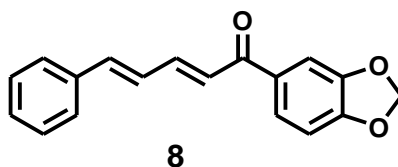

123

124 Yellow crystal

125 **Yield:** 83 %

126 **Purity:** 99.8%

127 **Melting point:** 123–125 °C

128 **UV-Vis:** λ<sub>max</sub> 356 nm

129 **<sup>1</sup>H NMR (600 MHz):** 7.62 (dd; 1.5 and 8.1; H-2' and H-6'), 7.63–7.59 (m; H-β), 7.53–  
130 7.51 (H-2 and H-6), 7.40 (dd; 7.2 and 8.1; H-3' and H-5'), 7.36–7.33 (m; H-4'), 7.08 (d;  
131 15; H-α), 7.04–7.03 (H-γ and H-δ), 6.91 (d; 8.4; H-5), 6.08 (s; –OCH<sub>2</sub>O–).

132 **<sup>13</sup>C NMR (150 MHz):** 188.2 (C=O), 151.6 (C-4), 148.3 (C-3), 144.3 (C-β), 141.6 (C-  
133 δ), 136.2 (C-1'), 133.0 (C-1), 129.2 (C-α), 128.9 (C-3' and C-5'), 127.3 (C-2' and C-  
134 6'), 127.0 (C-4'), 125.1 (C-γ), 124.5 (C-6), 108.4 (C-5), 107.9 (C-2), 101.9 (–OCH<sub>2</sub>O–).

135

136 1.8. (2*E*,4*E*)-1-(4-hydroxy-3-methoxyphenyl)-5-phenylpenta-2,4-dien-1-one (**9**)

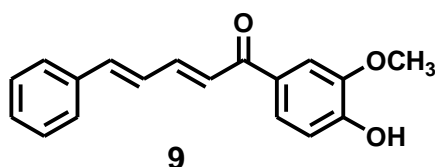

137

138 Yellow crystal

139 **Yield:** 98 %

140 **Purity:** 98.5%

141 **Melting point:** 207–210 °C

142 **UV-Vis:**  $\lambda_{\text{max}}$  356 nm

143 **<sup>1</sup>H NMR (300 MHz):** 7.66–7.58 (H- $\beta$ , H-2 and H-6), 7.52 (dd; 1.5 and 8.1; H-2' and H-  
 144 6'), 7.42–7.33 (H-3', H-4' and H-5'), 7.14 (d; 15; H- $\alpha$ ), 7.05–7.03 (H- $\gamma$  and H- $\delta$ ), 7.00  
 145 (d; 8.4; H-5), 6.10 (s; 4-OH), 4.00 (s; 3-OCH<sub>3</sub>).

146 **<sup>13</sup>C NMR (75 MHz):** 188.5 (C=O), 150.3 (C-3), 146.8 (C-4), 144.0 (C- $\beta$ ), 141.5 (C- $\delta$ ),  
 147 136.2 (C-1'), 131.1 (C-1), 129.1 (C- $\alpha$ ), 128.9 (C-3' and C-5'), 127.3 (C-2' and C-6'),  
 148 127.1 (C-4'), 125.0 (C- $\gamma$ ), 123.5 (C-6), 113.8 (C-5), 110.4 (C-2), 56.1 (4-OCH<sub>3</sub>).

149

150 1.9. (2E,4E)-1-(4-fluorophenyl)-5-phenylpenta-2,4-dien-1-one (**10**)

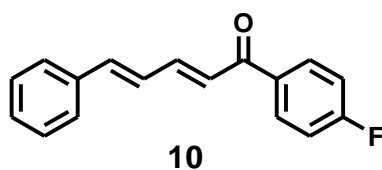

151

152 Yellow solid

153 **Yield:** 71 %

154 **Purity:** 99.1%

155 **Melting point:** 88–91 °C

156 **UV-Vis:**  $\lambda_{\text{max}}$  346 nm

157 **<sup>1</sup>H NMR (300 MHz):** 8.03 (d; 8.7; H-2 and H-6), 7.67–7.58 (m; H-β), 7.52 (dd; 1.3 and  
158 7.9; H-2' and H-6'), 7.43–7.35 (H-3', H-4', H-5'), 7.18 (dd; 8.7 and 9.0; H-3 and H-5),  
159 7.11–7.03 (H-α, H-γ and H-δ).

160 **<sup>13</sup>C NMR (75 MHz):** 188.8 (C=O), 165.5 (d;  $J_{CF} = 252$  Hz; C-4), 145.1 (C-β), 142.2  
161 (C-δ), 136.0 (C-1'), 134.5 (C-1), 131.0 (d;  $J_{CF} = 9.0$  Hz; C-2 and C-6), 129.3 (C-α),  
162 128.9 (C-3' and C-5'), 127.3 (C-2' and C-6'), 126.8 (C-4'), 124.9 (C-γ), 115.7 (d;  $J_{CF} =$   
163 21 Hz; C-3 and C-5).

164

165 1.10. (2*E*,4*E*)-1-(4-chlorophenyl)-5-phenylpenta-2,4-dien-1-one (**11**)

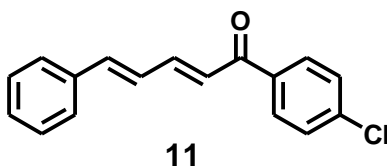

166

167 Yellow solid

168 **Yield:** 72 %

169 **Purity:** 99.8%

170 **Melting point:** 124–127 °C

171 **UV-Vis:**  $\lambda_{\max}$  349 nm

172 **<sup>1</sup>H NMR (300 MHz):** 7.94 (d; 8.7; H-2 and H-6), 7.67–7.59 (m; H-β), 7.54–7.35 (H-3,  
173 H-5, H-2', H-3', H-4', H-5' and H-6'), 7.09–7.03 (H-α, H-γ and H-δ).

174 **<sup>13</sup>C NMR (75 MHz):** 189.2 (C=O), 145.4 (C-β), 142.5 (C-δ), 139.1 (C-4), 136.5 (C-1),  
175 136.0 (C-1'), 129.8 (C-2 and C-6), 129.4 (C-α), 128.9 (C-3, C-5, C-3' and C-5'), 127.4  
176 (C-2' and C-6'), 126.8 (C-4'), 124.8 (C-γ).

177

178 1.11. (2*E*,4*E*)-1-(4-bromophenyl)-5-phenylpenta-2,4-dien-1-one (**12**)



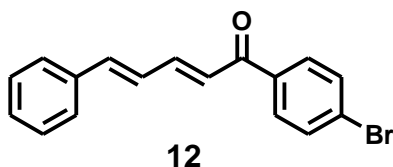

179

180 Yellow solid

181 **Yield:** 86 %

182 **Purity:** 98.7 %

183 **Melting point:** 142–145 °C

184 **UV-Vis:**  $\lambda_{\max}$  350 nm

185  **$^1\text{H NMR}$  (300 MHz):** 7.86 (d; 8.5; H-2 and H-6), 7.65 (d; 8.5; H-3 and H-5), 7.62–7.59  
186 (m; H- $\beta$ ), 7.52 (dd; 1.5 and 8.1; H-2' and H-6'), 7.43–7.35 (H-3', H-4' and H-5'), 7.08–  
187 7.03 (H- $\alpha$ , H- $\gamma$  and H- $\delta$ ).

188  **$^{13}\text{C NMR}$  (75 MHz):** 189.4 (C=O), 145.4 (C- $\beta$ ), 142.5 (C- $\delta$ ), 136.9 (C-1), 136.0 (C-1'),  
189 131.9 (C-3 and C-5), 129.9 (C-2 and C-6), 129.4 (C- $\alpha$ ), 128.9 (C-3' and C-5'), 127.8  
190 (C-4), 127.4 (C-2' and C-6'), 126.8 (C-4'), 124.7 (C- $\gamma$ ).

191

192 1.12. (2E,4E)-1-(3,4-dichlorophenyl)-5-phenylpenta-2,4-dien-1-one (**13**)

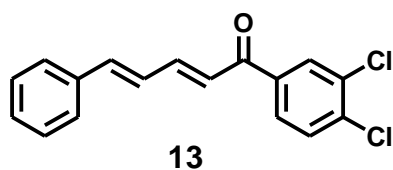

193

194 Yellow crystal

195 **Yield:** 79 %

196 **Purity:** 97.5%

197 **Melting point:** 165–167 °C

198 **UV-Vis:**  $\lambda_{\max}$  353 nm

199 **<sup>1</sup>H NMR (600 MHz):** 8.08 (d; 2.1; H-2), 7.82 (dd; 2.1 and 8.4; H-6), 7.67–7.63 (m; H-  
200 β), 7.59 (d; 8.4; H-5), 7.53 (dd; 1.2 and 7.8; H-2' and H-6'), 7.42–7.35 (H-3', H-4' and  
201 H-5'), 7.10–7.02 (H-α, H-γ and H-δ).

202 **<sup>13</sup>C NMR (150 MHz):** 187.9 (C=O), 146.0 (C-β), 143.1 (C-δ), 137.8 (C-4), 137.2 (C-  
203 1), 135.9 (C-3), 133.2 (C-1'), 130.7 (C-2), 130.4 (C-5), 129.6 (C-α), 128.9 (C-3' and C-  
204 5'), 127.4 (C-6, C-2' and C-6'), 126.6 (C-4'), 124.1 (C-γ).

205

206 1.13. (2*E*,4*E*)-1-(3-(trifluoromethyl)phenyl)-5-phenylpenta-2,4-dien-1-one (**14**)

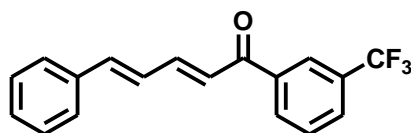

207

208 Yellow solid

209 **Yield:** 88%

210 **Purity:** 96.1%

211 **Melting point:** 126–130 °C

212 **UV-Vis:**  $\lambda_{\max}$  351 nm

213 **<sup>1</sup>H NMR (600 MHz):** 8.25 (m; H-2), 8.18 (d; 7.8; H-6), 7.85 (d; 7.2; H-4), 7.70–7.67  
214 (m; H-β), 7.65 (d; 7.8; H-5), 7.54 (dd; 1.8 and 8.1; H-2' and H-6'), 7.43–7.36 (H-3', H-  
215 4' and H-5'), 7.12 (d; 15.0; H-α), 7.09–7.08 (H-γ and H-δ).

216 **<sup>13</sup>C NMR (150 MHz):** 189.0 (C=O), 146.1 (C-β), 143.3 (C-δ), 138.8 (C-1), 135.9 (C-  
217 1'), 131.5 (C-6), 131.2 (d;  $J_{CF}$  = 33 Hz; C-3), 129.5 (C-α), 129.3 (C-5), 129.1 (C-4),  
218 128.9 (C-3' and C-5'), 127.4 (C-2' and C-6'), 126.7 (C-4'), 125.2 (C-2), 124.4 (C-γ),  
219 123.8 (d;  $J_{CF}$  = 271 Hz; 4-CF<sub>3</sub>).

220

221 1.14. (2*E*,4*E*)-1-(3-nitrophenyl)-5-phenylpenta-2,4-dien-1-one (**15**)

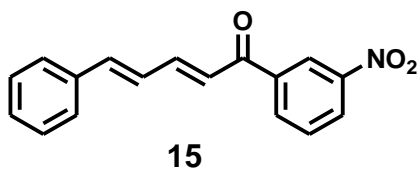

222

223 Yellow solid

224 **Yield:** 85 %

225 **Purity:** 97.8%

226 **Melting point:** 128–130 °C

227 **UV-Vis:**  $\lambda_{\max}$  354 nm

228  **$^1\text{H}$  NMR (400 MHz):** 8.82 (dd; 2.0 and 2.0; H-2), 8.45 (ddd; 1.2, 2.0 and 8.0; H-4),

229 8.33 (ddd; 1.2, 2.0 and 7.8; H-6), 7.72 (dd; 7.8 and 8.0; H-5), 7.74–7.68 (m; H- $\beta$ ), 7.55

230 (dd; 1.4 and 8.2; H-2' and H-6'), 7.44–7.38 (H-3', H-4' and H-5'), 7.13 (d; 15.6; H- $\alpha$ ),

231 7.11–7.09 (H- $\gamma$  and H- $\delta$ ).

232  **$^{13}\text{C}$  NMR (100 MHz):** 187.9 (C=O), 148.4 (C-3), 146.7 (C- $\beta$ ), 143.6 (C- $\delta$ ), 139.6 (C-

233 1), 135.8 (C-1'), 134.0 (C-6), 129.9 (C-5), 129.7 (C- $\alpha$ ), 129.0 (C-3' and C-5'), 127.5

234 (C-2' and C-6'), 126.9 (C-4'), 126.5 (C-4), 123.9 (C- $\gamma$ ), 123.2 (C-2).

235

236 1.15. (2*E*,4*E*)-1-(4-nitrophenyl)-5-phenylpenta-2,4-dien-1-one (**16**)

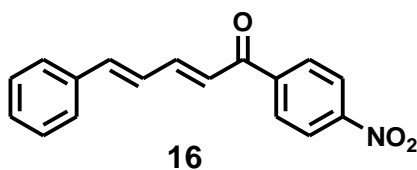

237

238 Yellow solid

239 **Yield:** 84 %

240 **Purity:** 97.7%

241 **Melting point:** 177–180 °C

242 **UV-Vis:**  $\lambda_{\max}$  361 nm

243 **<sup>1</sup>H NMR (400 MHz):** 8.36 (d; 8.8; H-3 and H-5), 8.12 (d; 8.8; H-2 and H-6), 7.70–7.64  
244 (m; H-β), 7.54 (dd; 1.8 and 8.2; H-2' and H-6'), 7.44–7.38 (H-3', H-4' and H-5'), 7.10–  
245 7.05 (H-α, H-γ and H-δ).

246 **<sup>13</sup>C NMR (100 MHz):** 188.9 (C=O), 149.9 (C-4), 146.8 (C-β), 143.7 (C-δ), 143.1 (C-  
247 1), 135.7 (C-1'), 129.8 (C-α), 129.3 (C-2 and C-6), 129.0 (C-3' and C-5'), 127.5 (C-2'  
248 and C-6'), 126.5 (C-4'), 124.5 (C-γ), 123.8 (C-3 and C-5).

249

250 1.16. (2*E*,4*E*)-1-(3-methylphenyl)-5-phenylpenta-2,4-dien-1-one (**17**)

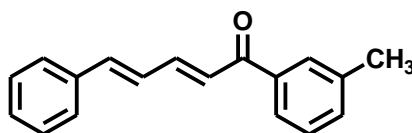

251

252 Orange oil

253 **Yield:** 49 %

254 **Purity:** 96.4%

255 **UV-Vis:** λ<sub>max</sub> 344 nm

256 **<sup>1</sup>H NMR (600 MHz):** 7.82 (m; H-2), 7.81–7.79 (m; H-6), 7.65–7.60 (m; H-β), 7.53 (dd;  
257 1.2 and 7.8; H-2' and H-6'), 7.42–7.39 (H-4, H-5, H-3' and H-5'), 7.37–7.34 (m; H-4'),  
258 7.12 (d; 15; H-α), 7.06–7.05 (H-γ and H-δ), 2.46 (s; 3-CH<sub>3</sub>).

259 **<sup>13</sup>C NMR (150 MHz):** 190.7 (C=O), 144.7 (C-β), 141.8 (C-δ), 138.4 (C-3), 138.3 (C-  
260 1), 136.1 (C-1'), 133.5 (C-4), 129.2 (C-α), 129.0 (C-2), 128.9 (C-3' and C-5'), 128.5  
261 (C-5), 127.3 (C-2' and C-6'), 127.0 (C-4'), 125.6 (C-γ and C-6), 21.4 (3-CH<sub>3</sub>).

262

263 1.17. (2*E*,4*E*)-1-(4-methylphenyl)-5-phenylpenta-2,4-dien-1-one (**18**)

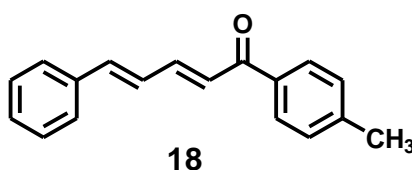

264

265 Yellow solid

266 **Yield:** 53 %

267 **Purity:** 99.9%

268 **Melting point:** 77–79 °C

269 **UV-Vis:**  $\lambda_{\max}$  346 nm

270 **<sup>1</sup>H NMR (300 MHz):** 7.91 (d; 8.4; H-2 and H-6), 7.66–7.57 (m; H- $\beta$ ), 7.52 (dd; 1.5 and  
271 8.1; H-2' and H-6'), 7.42–7.29 (H-3', H-4' and H-5'), 7.31 (d; 8.4; H-3 and H-5), 7.12  
272 (d; 14.7; H- $\alpha$ ), 7.05–7.03 (H- $\gamma$  and H- $\delta$ ), 2.45 (s; 4-CH<sub>3</sub>).

273 **<sup>13</sup>C NMR (150 MHz):** 190.0 (C=O), 144.5 (C- $\beta$ ), 143.5 (C-4), 141.7 (C- $\delta$ ), 136.2 (C-  
274 1'), 135.6 (C-1), 129.3 (C-2 and C-6), 129.2 (C- $\alpha$ ), 128.9 (C-3 and C-5), 128.6 (C-3'  
275 and C-5'), 127.3 (C-2' and C-6'), 127.0 (C-4'), 125.5 (C- $\gamma$ ), 21.7 (4-CH<sub>3</sub>).

276

277

278

279

280

281

282

283

284

285

286

287

288

289

290

291

292

293

294 **Figure S1. i)**  $^1\text{H}$  NMR spectrum of cinnamylideneacetophenone **2**

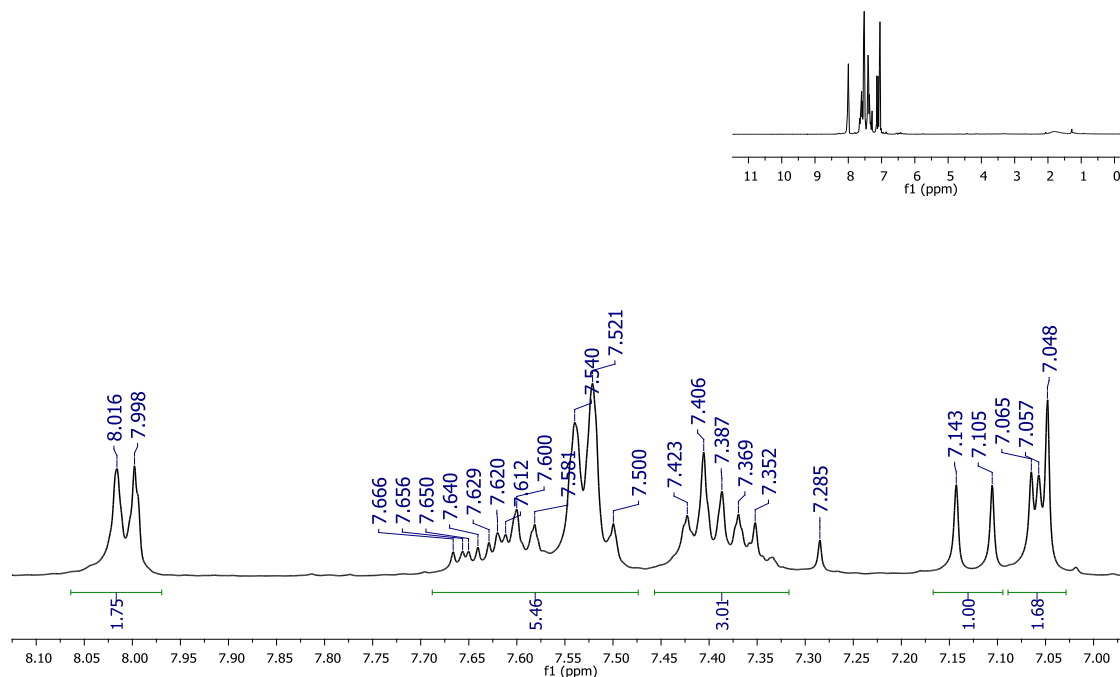

295  
296  
297

298 **Figure S1. ii)**  $^{13}\text{C}$  NMR spectrum of cinnamylideneacetophenone **2**

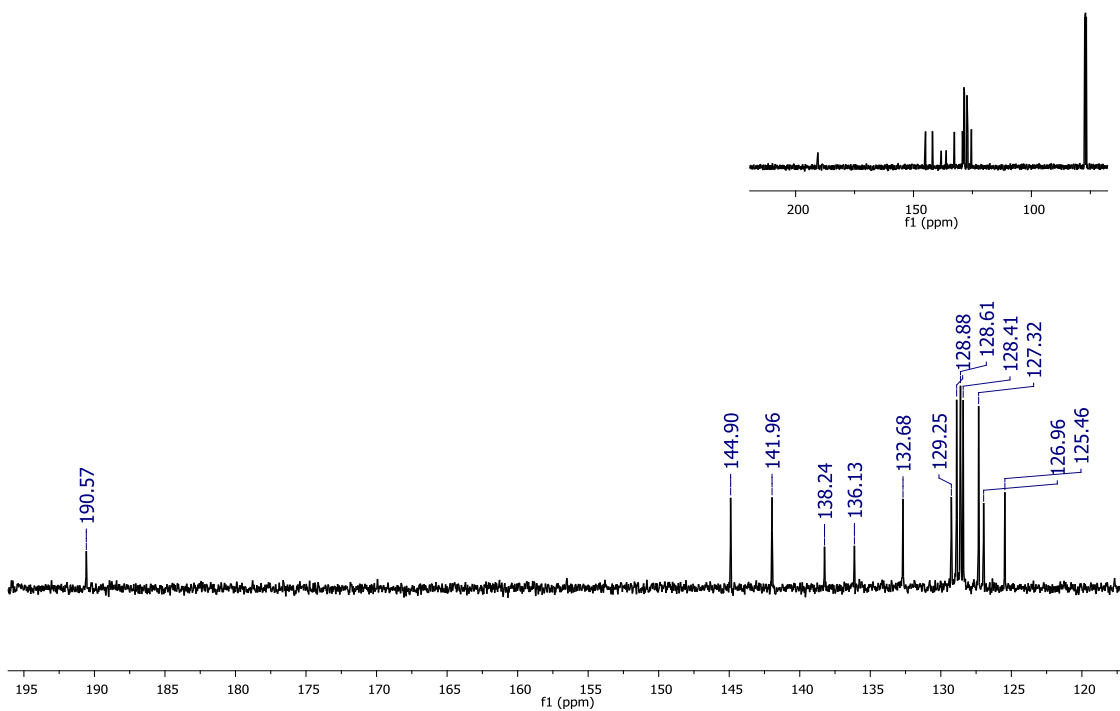

299  
300  
301  
302

303 **Figure S1. iii)** UV-Vis spectrum of cinnamylideneacetophenone **2**, MeOH/H<sub>2</sub>O (3:1)

304

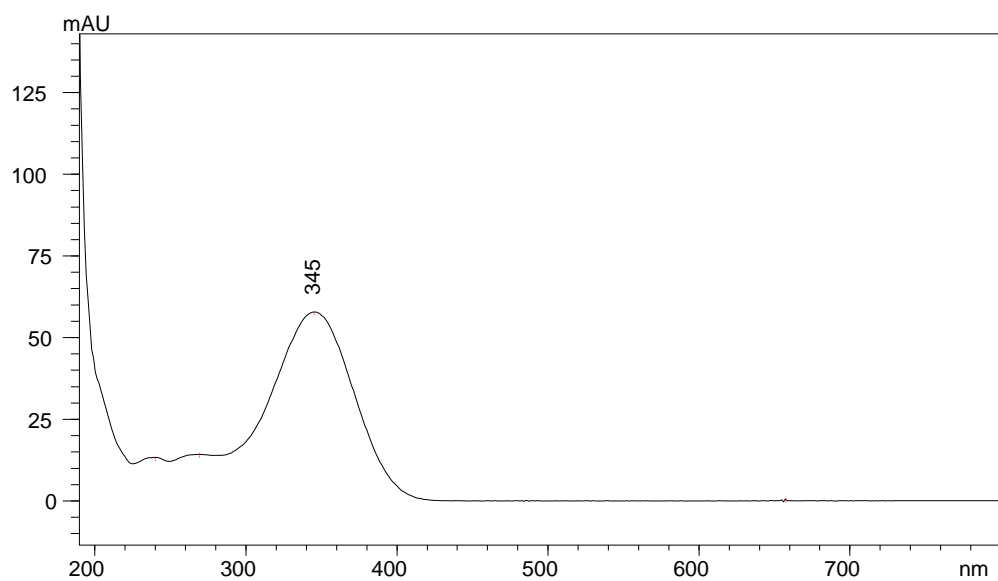

305

306

307

308

309

310

311

312 **Figure S1. iv)** HPLC chromatogram of cinnamylideneacetophenone **2**

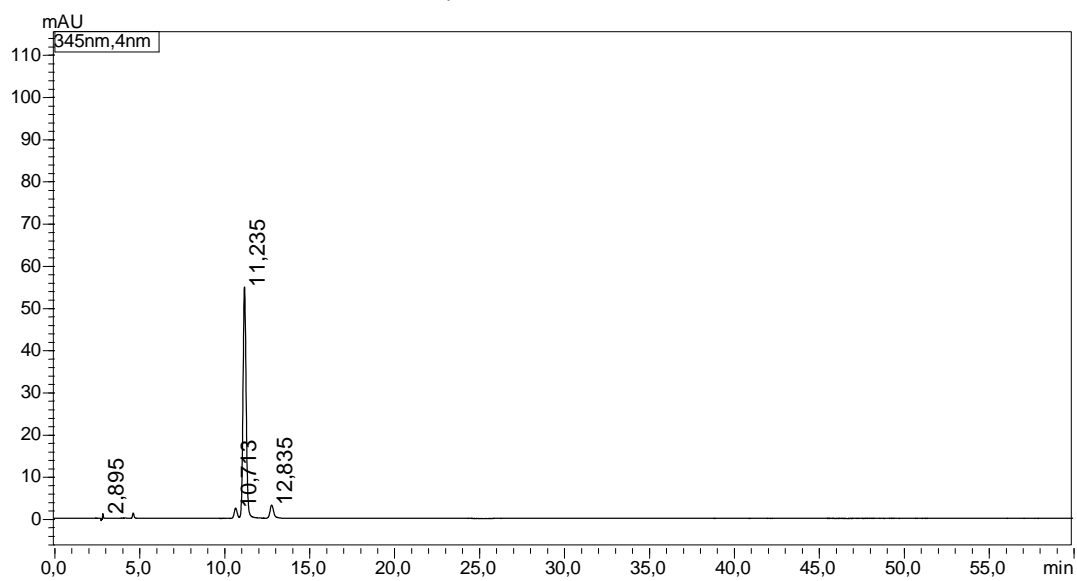

313

314

315

316

317 **Figure S2. i)**  $^1\text{H}$  NMR spectrum of cinnamylideneacetophenone **3**

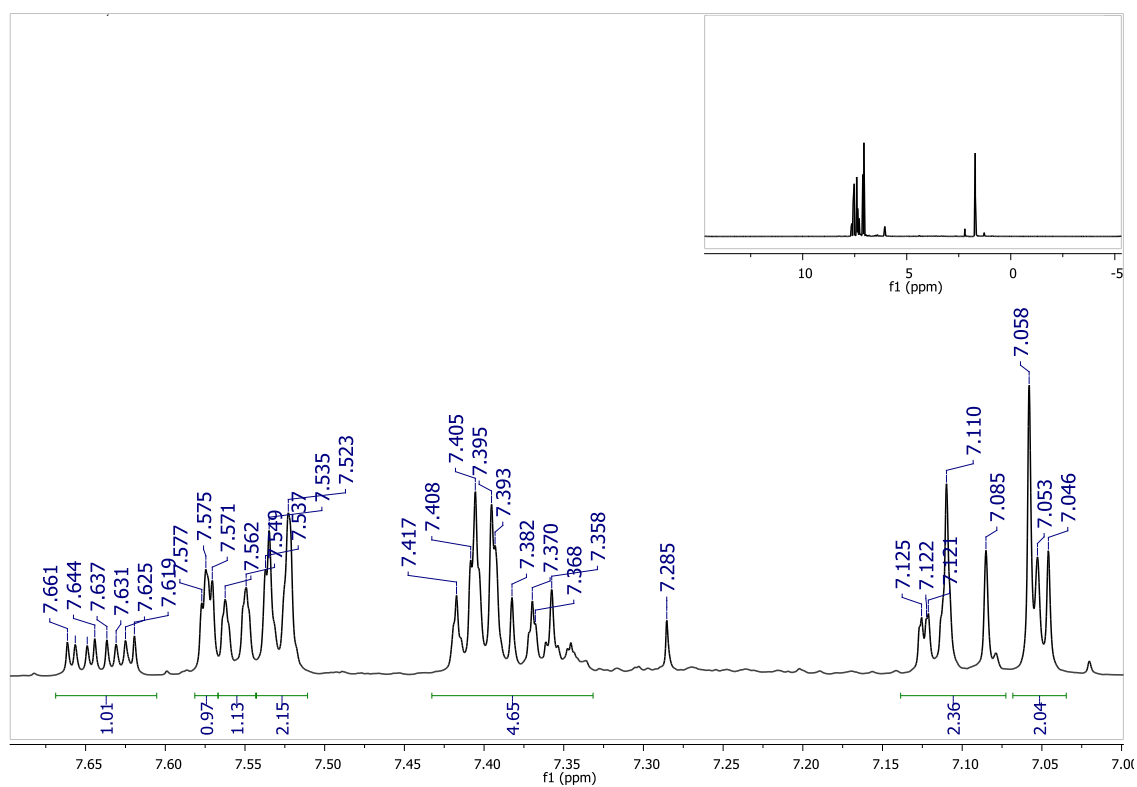

318  
319

320 **Figure S2. ii)**  $^{13}\text{C}$  NMR spectrum of cinnamylideneacetophenone **3**

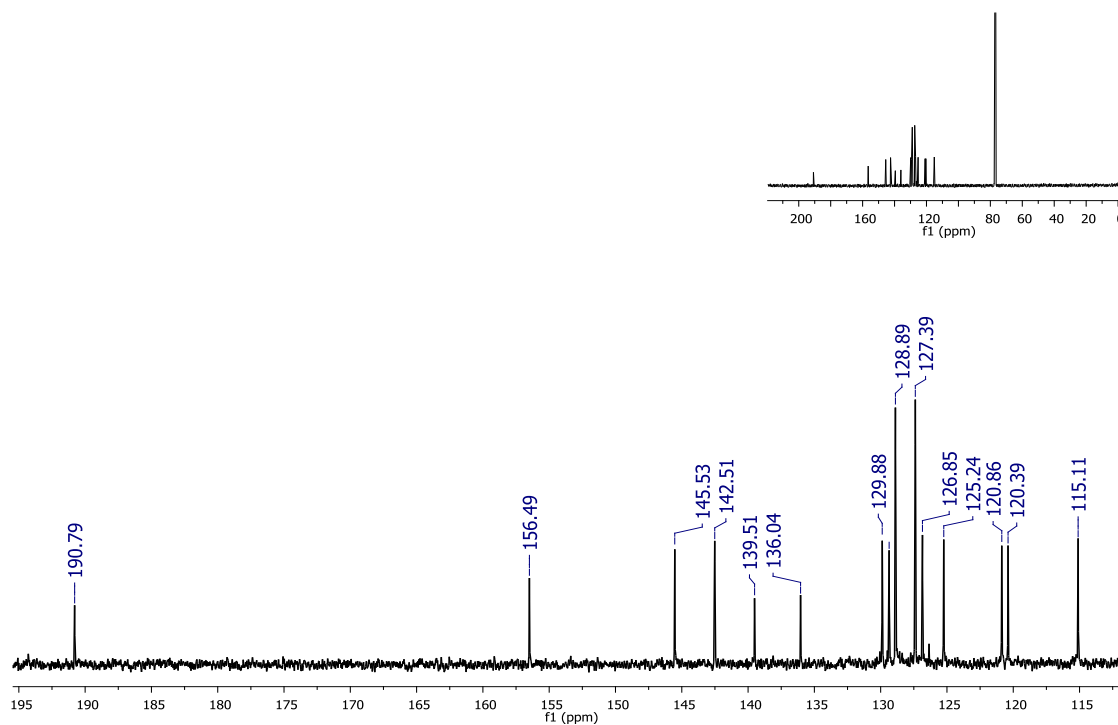

321  
322  
323  
324



325 **Figure S2. iii)** UV-Vis spectrum of cinnamylideneacetophenone **3**, MeOH/H<sub>2</sub>O (3:1)

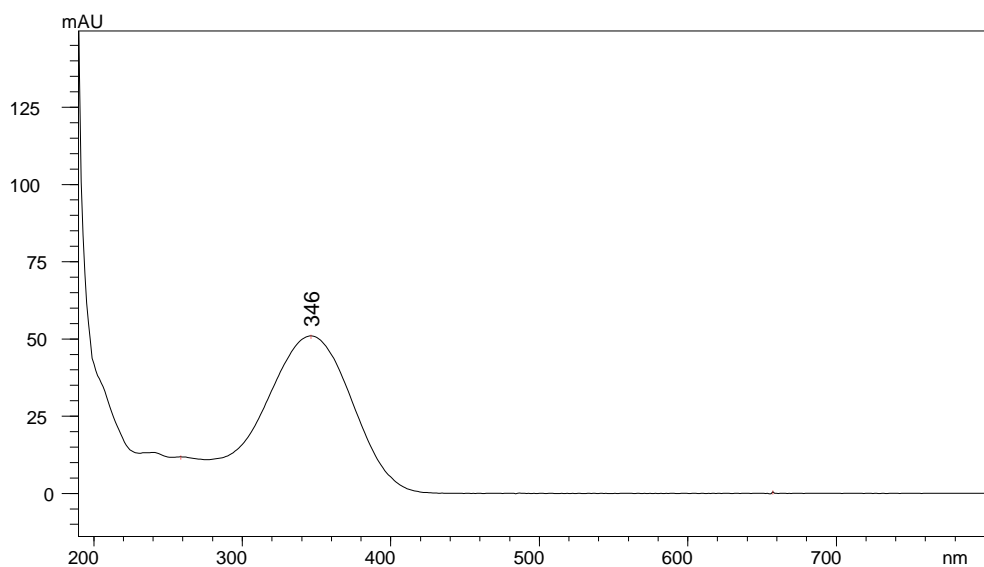

326

327

328

329

330

331

332 **Figure S2. iv)** HPLC chromatogram of cinnamylideneacetophenone **3**

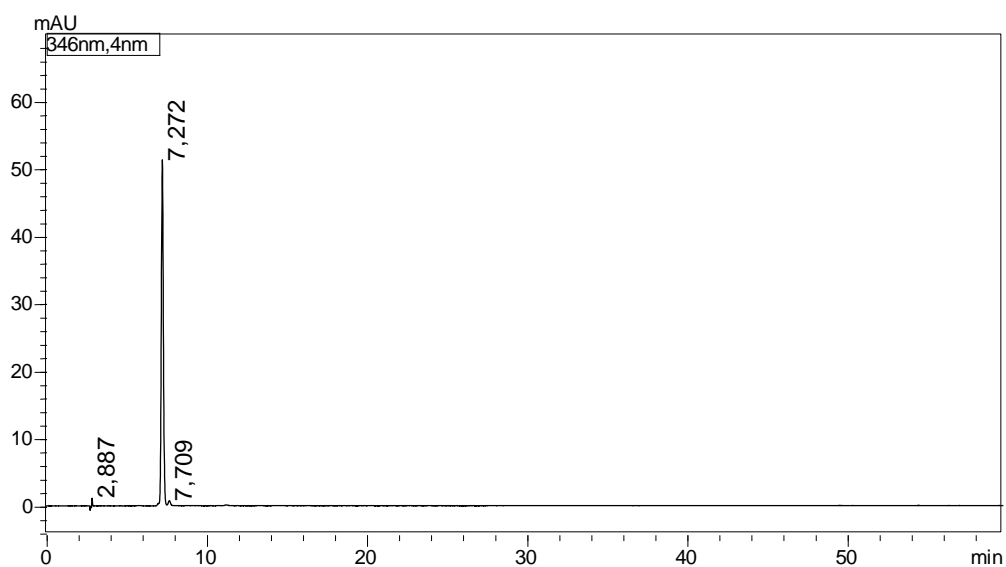

333

334

335

336

337

338 **Figure S3. i)**  $^1\text{H}$  NMR spectrum of cinnamylideneacetophenone **4**

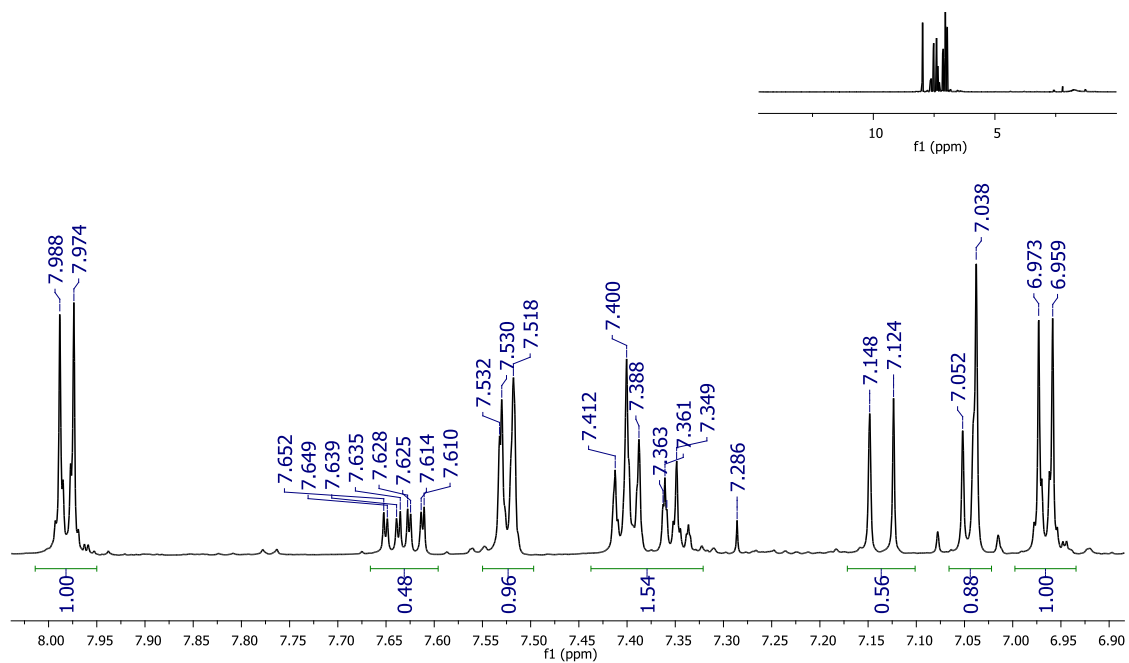

339

340

341 **Figure S3. ii)**  $^{13}\text{C}$  NMR spectrum of cinnamylideneacetophenone **4**

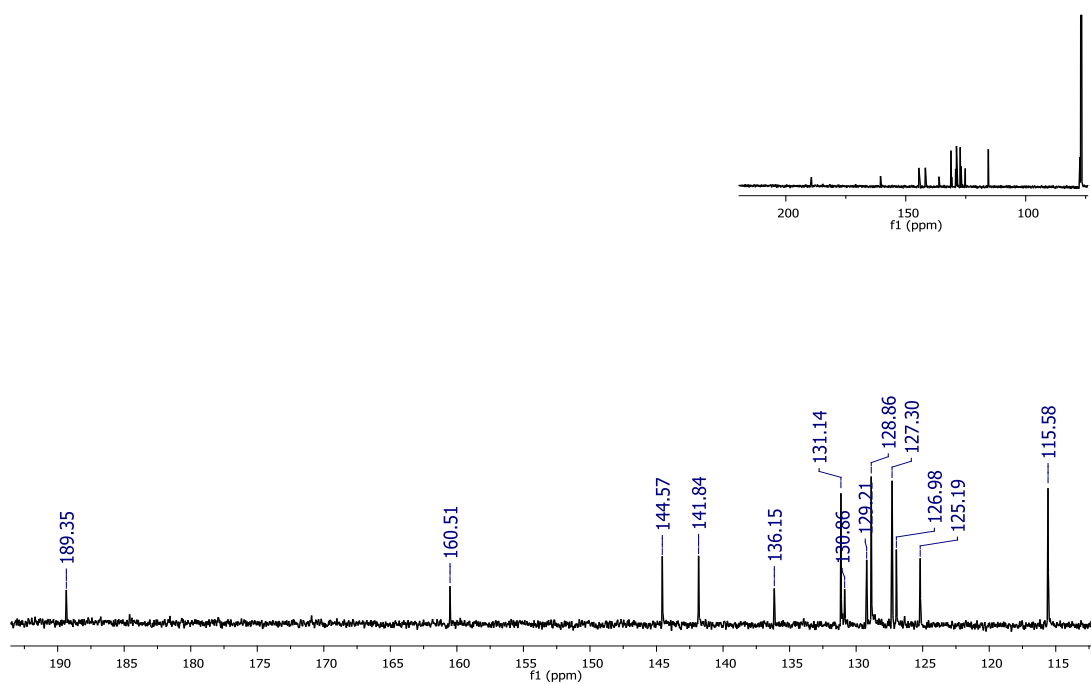

342

343

344 **Figure S3. iii)** UV-Vis spectrum of cinnamylideneacetophenone **4**, MeOH/H<sub>2</sub>O (3:1)

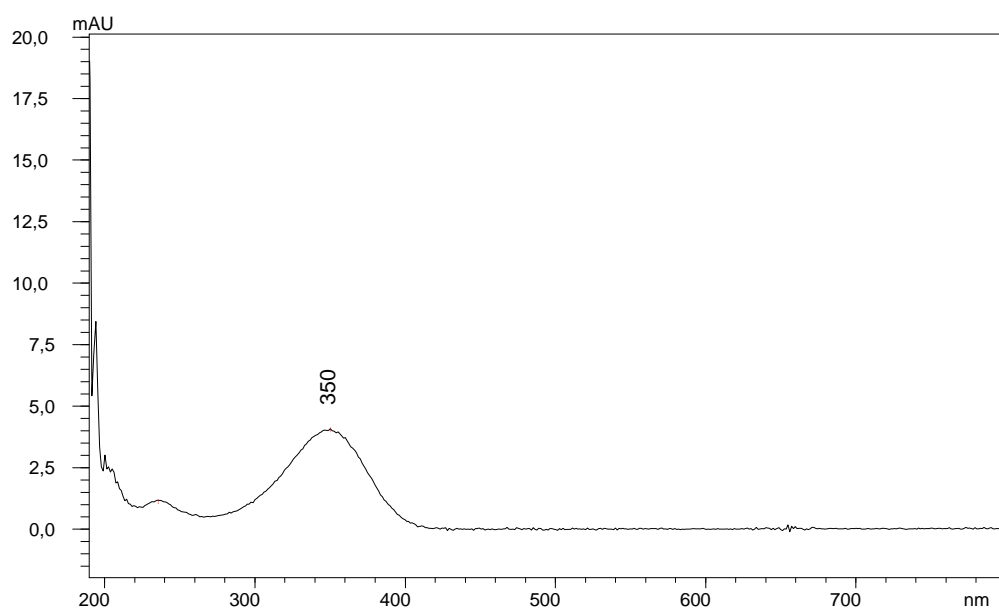

345

346

347

348

349 **Figure S3. iv)** HPLC chromatogram of cinnamylideneacetophenone **4**

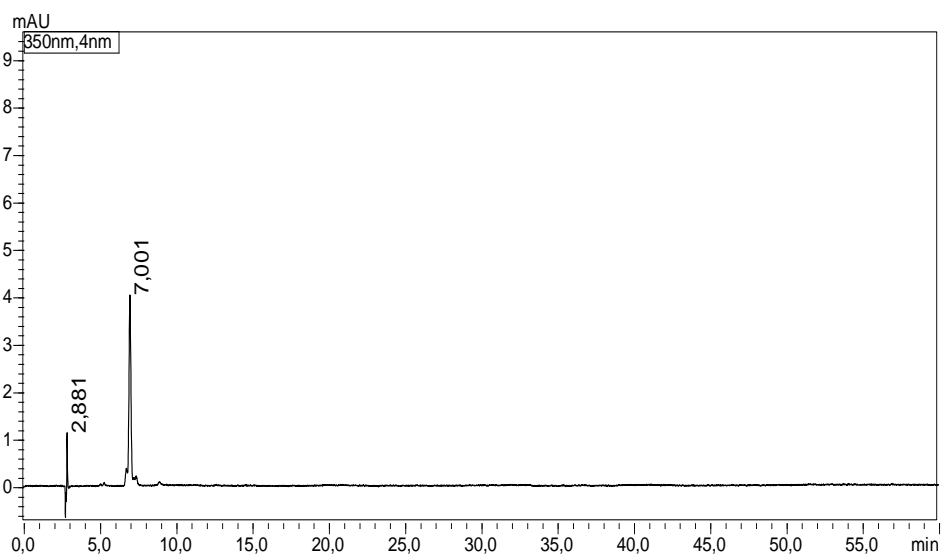

350

351

352

353

354 **Figure S4. i)**  $^1\text{H}$  NMR spectrum of cinnamylideneacetophenone **5**

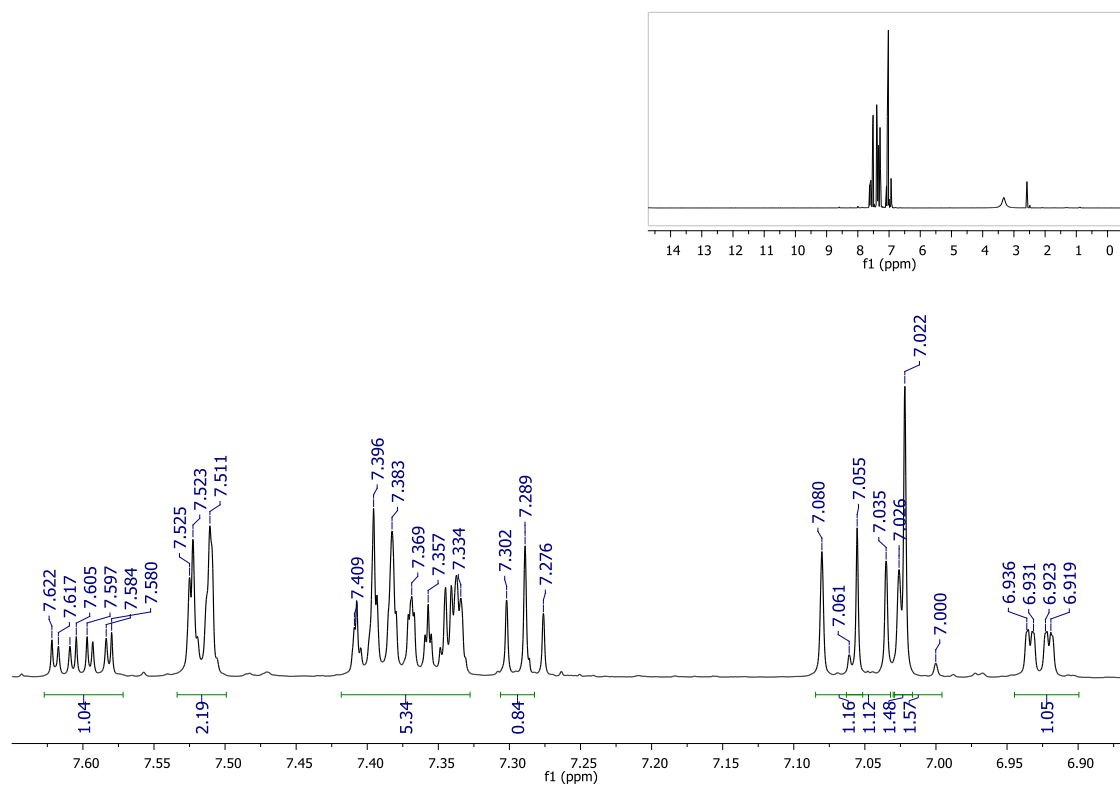

355

356

357 **Figure S4. ii)**  $^{13}\text{C}$  NMR spectrum of cinnamylideneacetophenone **5**

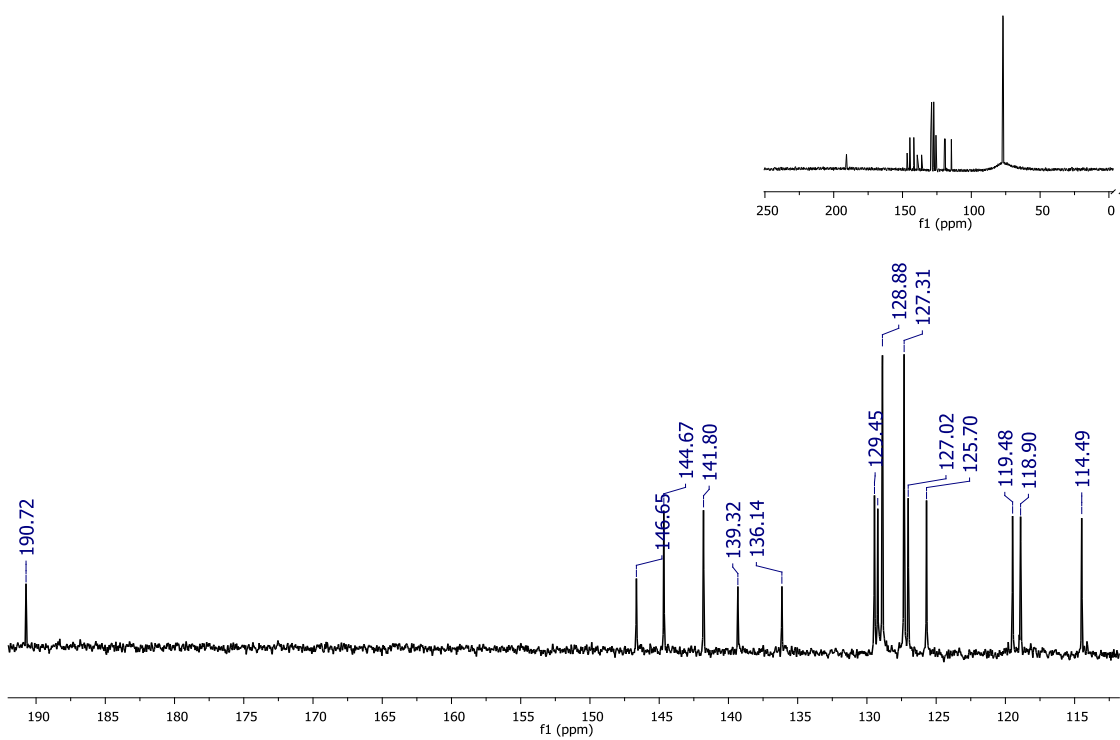

358

359

360 **Figure S4. iii)** UV-Vis spectrum of cinnamylideneacetophenone **5**, MeOH/H<sub>2</sub>O (3:1)

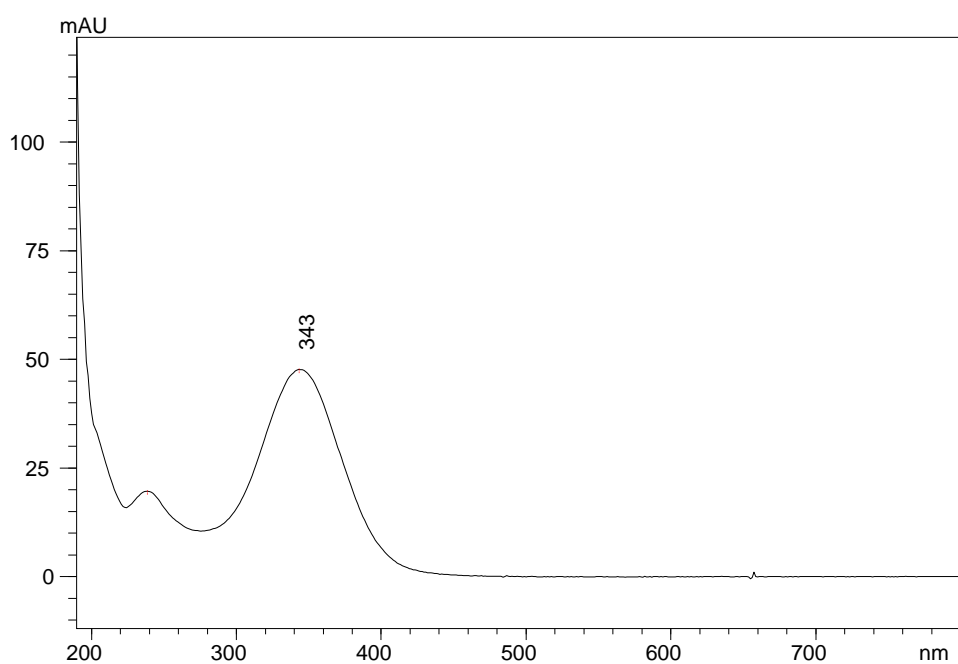

361

362

363

364 **Figure S4. iv)** HPLC chromatogram of cinnamylideneacetophenone **5**

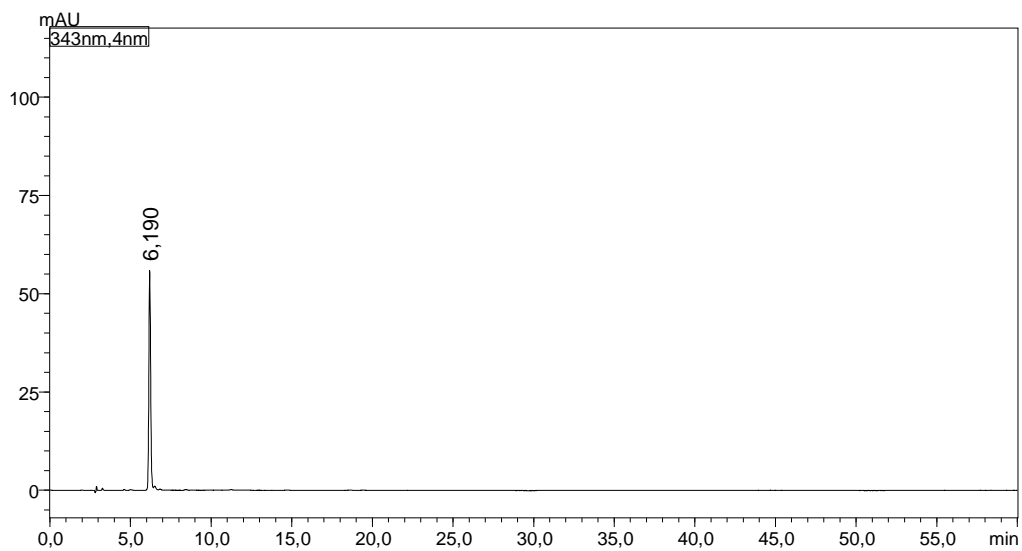

365

366

367

368

369

370 **Figure S5.**  $^1\text{H}$  NMR spectrum of cinnamylideneacetophenone **6**

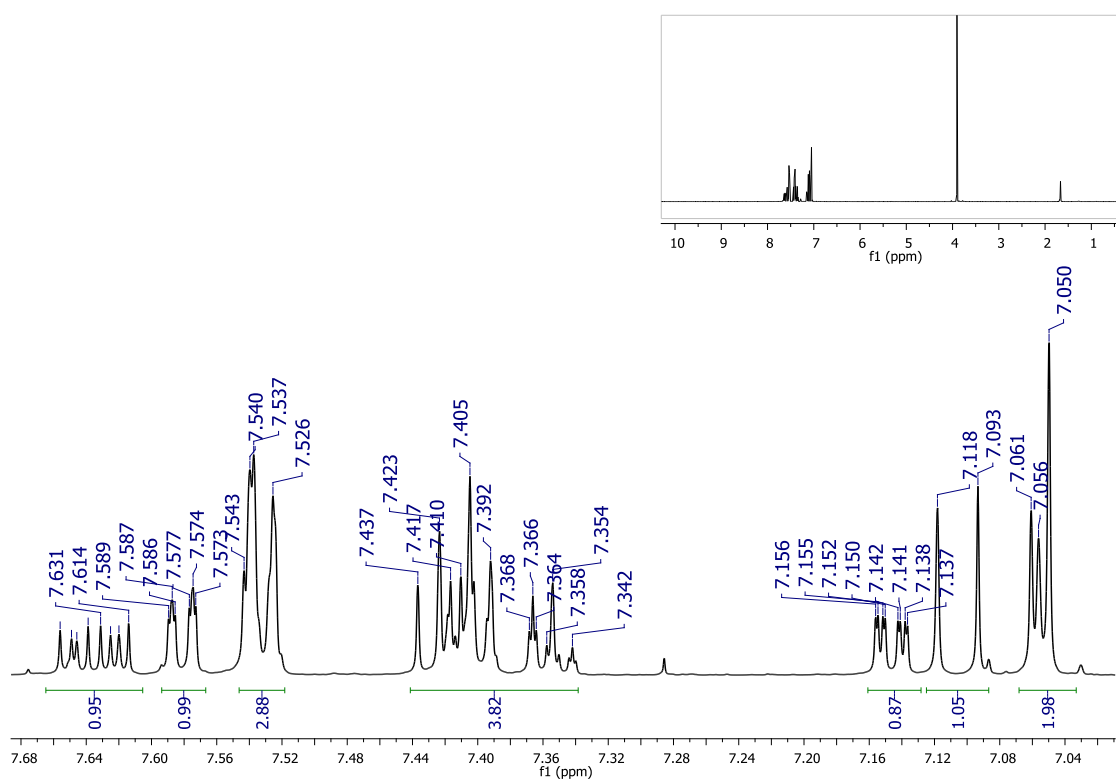

371

372

373

374 **Figure S5. ii)**  $^{13}\text{C}$  NMR spectrum of cinnamylideneacetophenone **6**

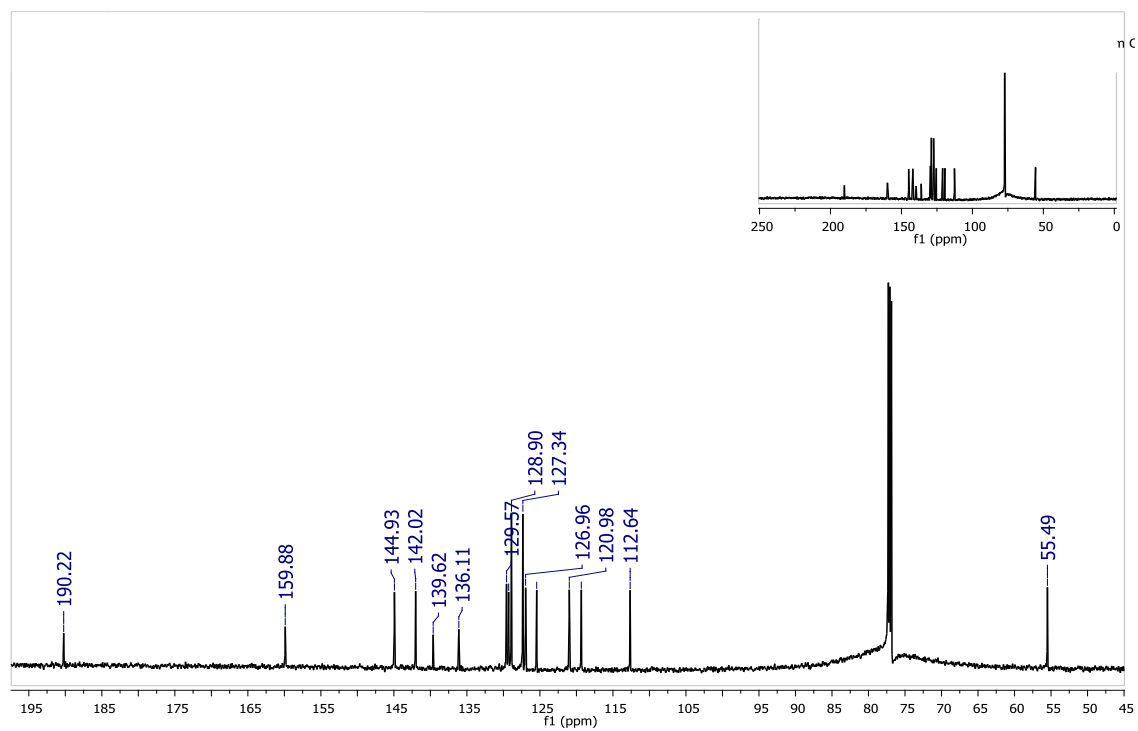

375

376 **Figure S5. iii)** UV-Vis spectrum of cinnamylideneacetophenone **6**, MeOH/H<sub>2</sub>O (3:1)

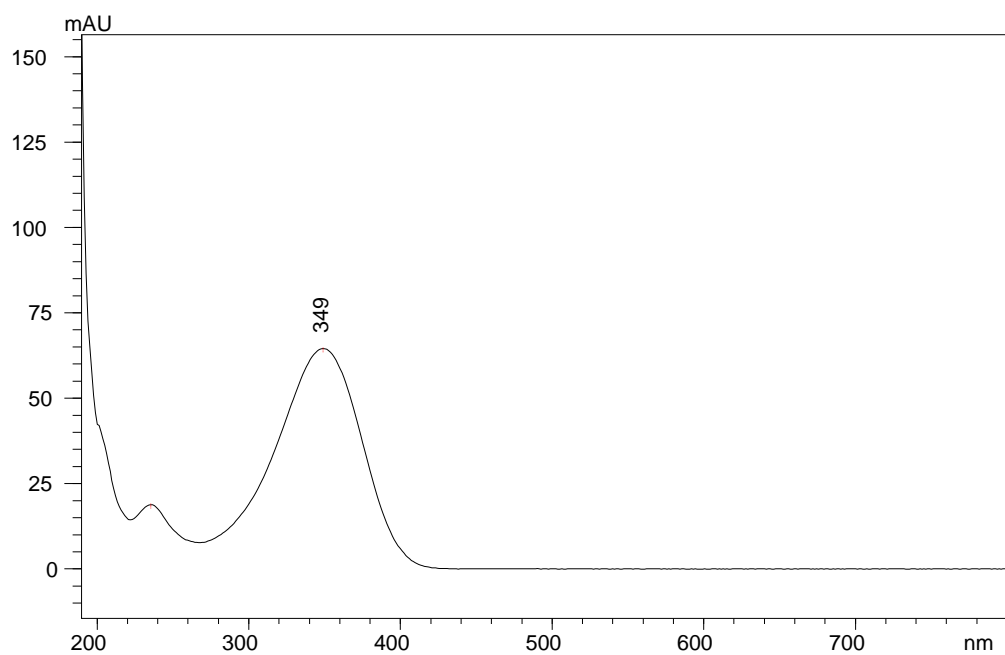

377

378

379

380

381 **Figure S5. iv)** HPLC chromatogram of cinnamylideneacetophenone **6**

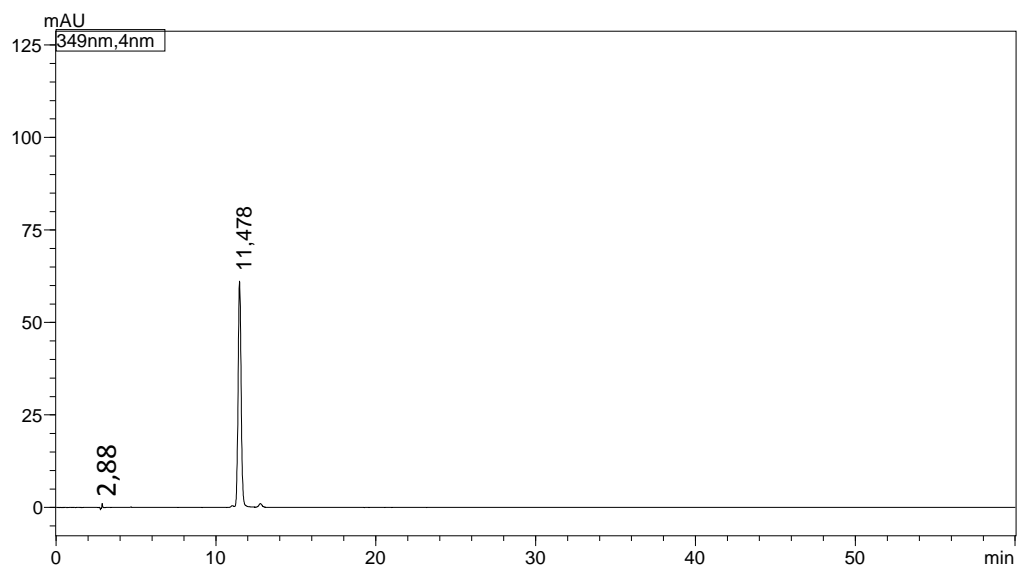

382

383

384

385

386

387 **Figure S6. i)**  $^1\text{H}$  NMR spectrum of cinnamylideneacetophenone **7**

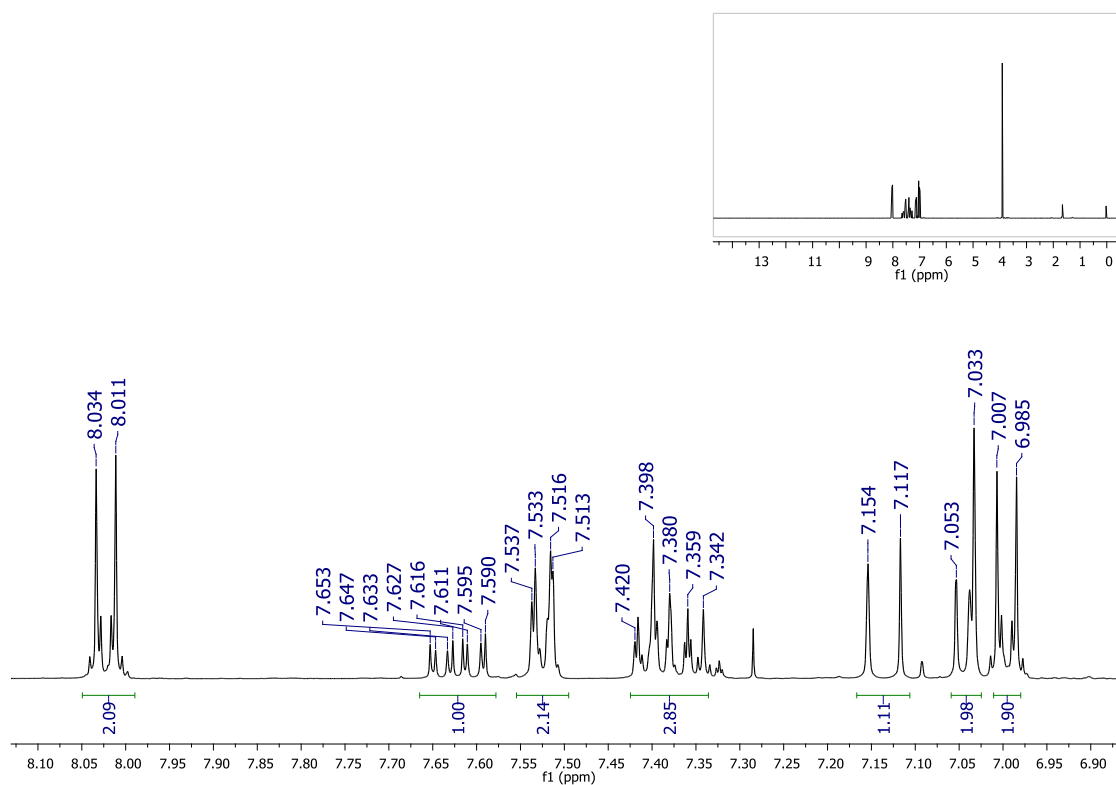

388

389

390 **Figure S6. ii)**  $^{13}\text{C}$  NMR spectrum of cinnamylideneacetophenone **7**

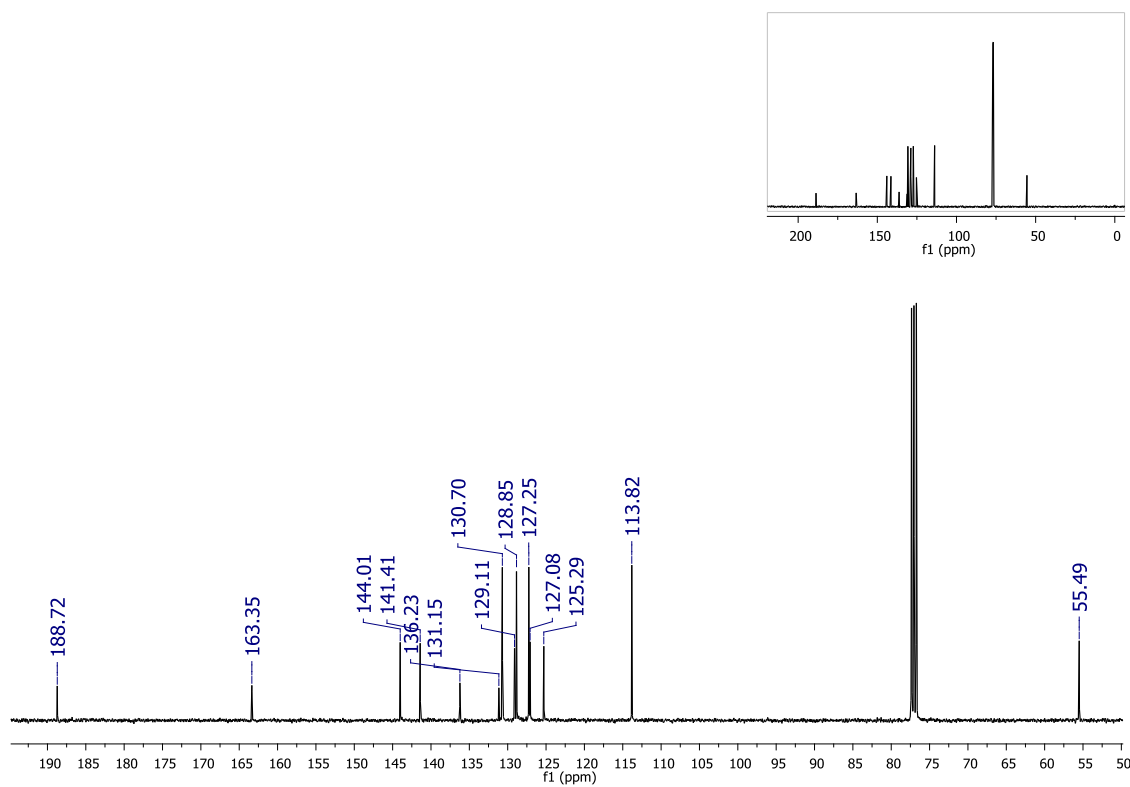

391



392 **Figure S6. iii)** UV-Vis spectrum of cinnamylideneacetophenone **7**, MeOH/H<sub>2</sub>O (3:1)

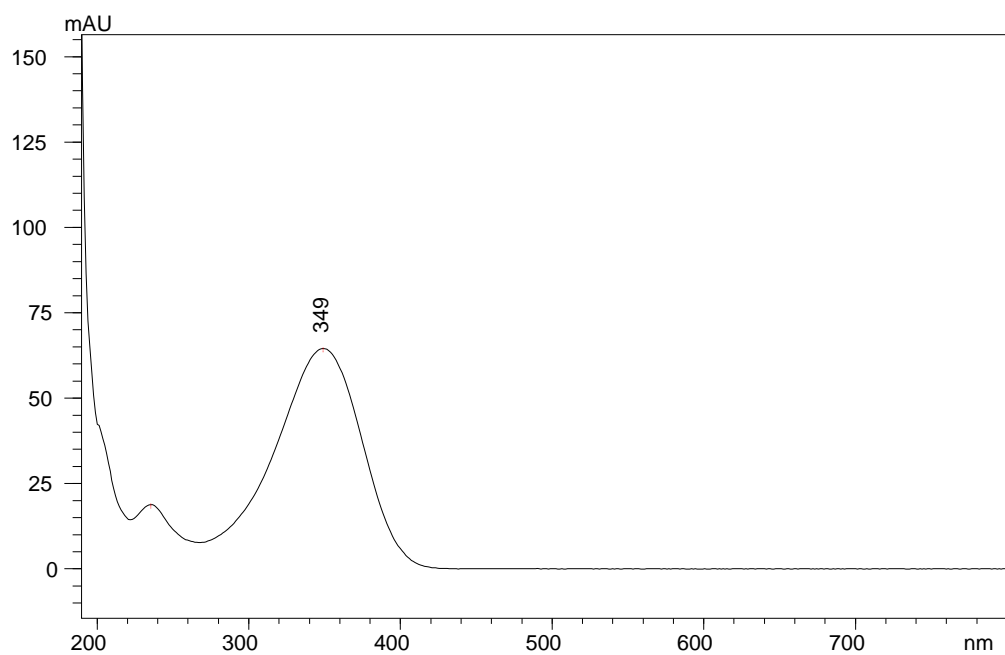

393

394

395

396

397 **Figure S6. iv)** HPLC chromatogram of cinnamylideneacetophenone **7**

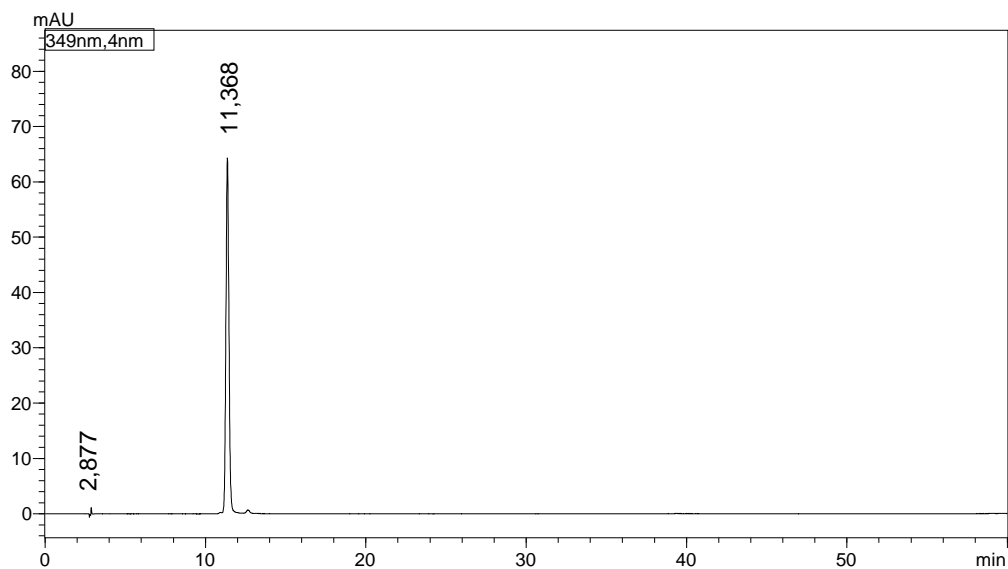

398

399

400

401

402

403

404 **Figure S7. i)**  $^1\text{H}$  NMR spectrum of cinnamylideneacetophenone **8**

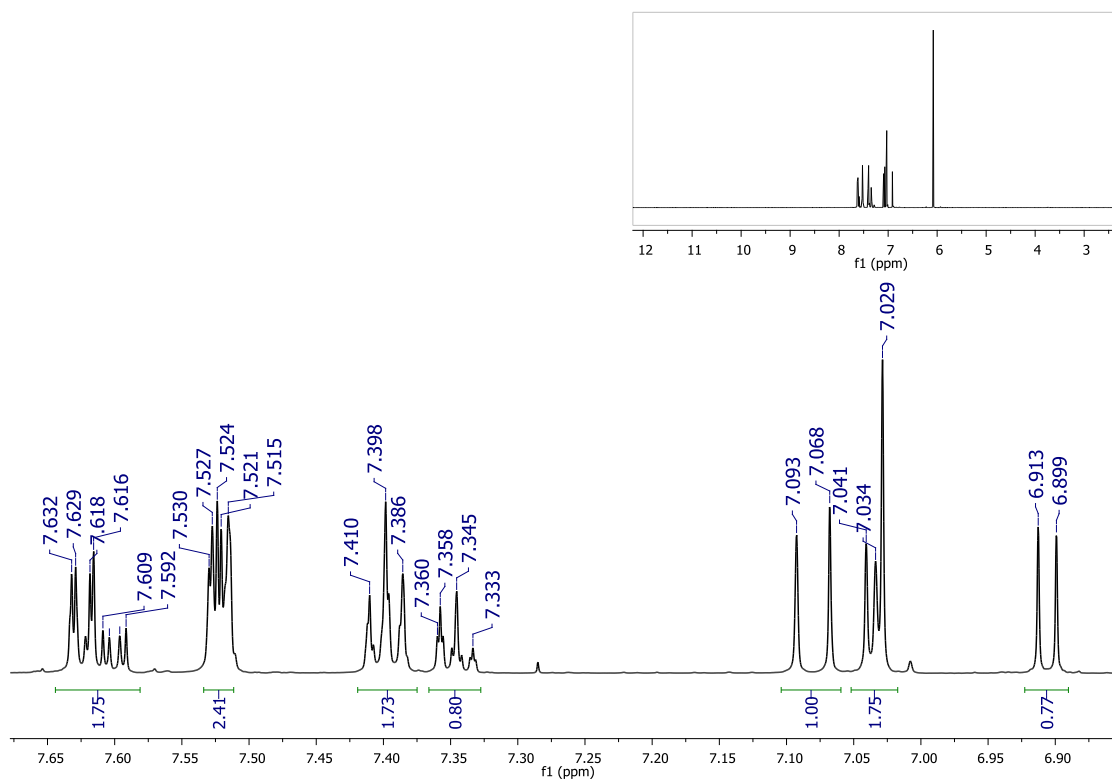

405

406

407

408 **Figure S7. ii)**  $^{13}\text{C}$ -NMR spectrum of cinnamylideneacetophenone **8**

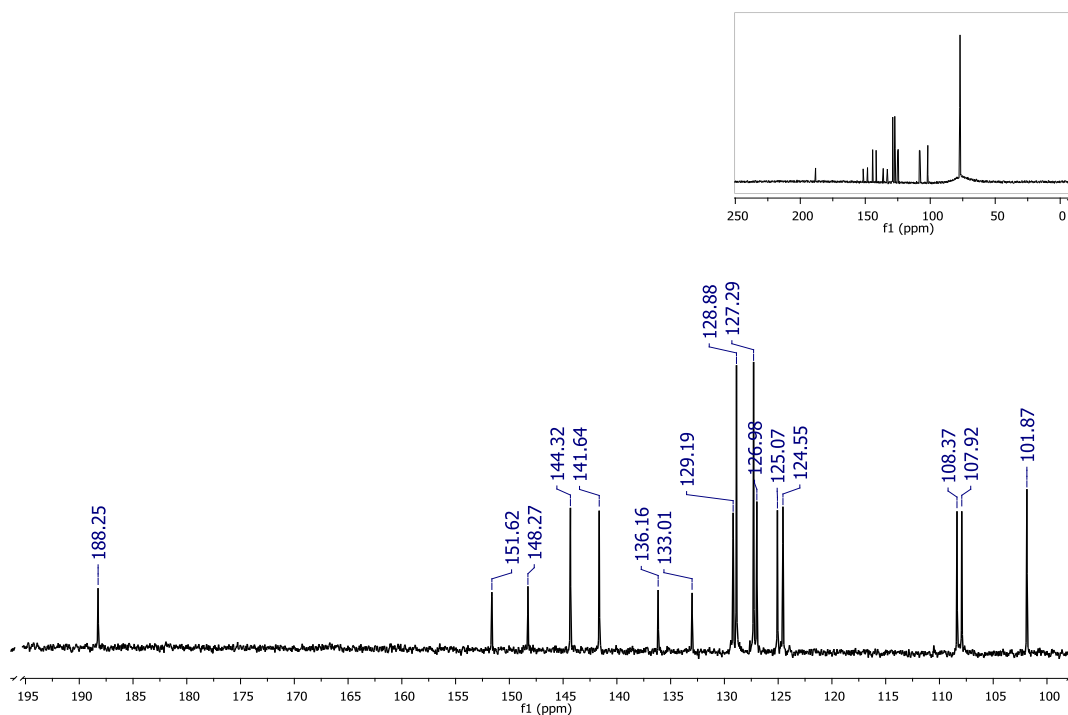

409

410 **Figure S7. iii)** UV-Vis spectrum of cinnamylideneacetophenone **8**, MeOH/H<sub>2</sub>O (3:1)

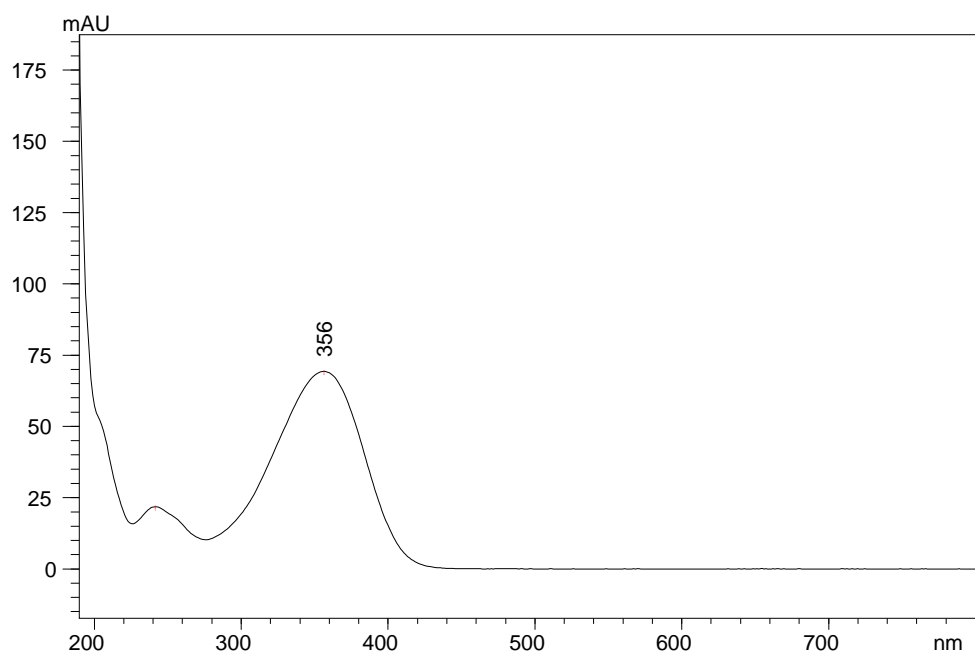

411

412

413

414

415 **Figure S7. iv)** HPLC chromatogram of cinnamylideneacetophenone **8**

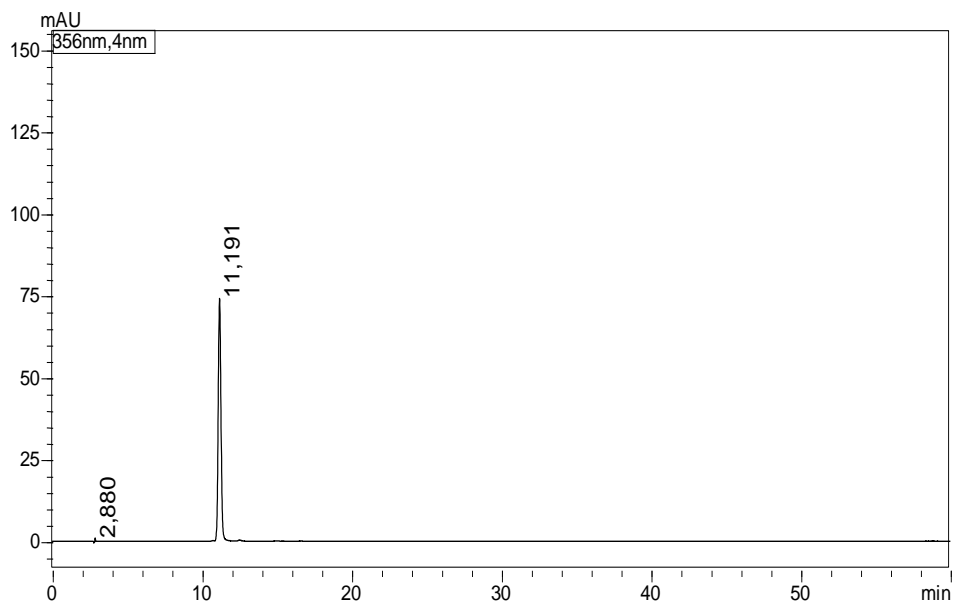

416

417

418

419

420

421

422 **Figure S8. i)**  $^1\text{H}$  NMR spectrum of cinnamylideneacetophenone **9**

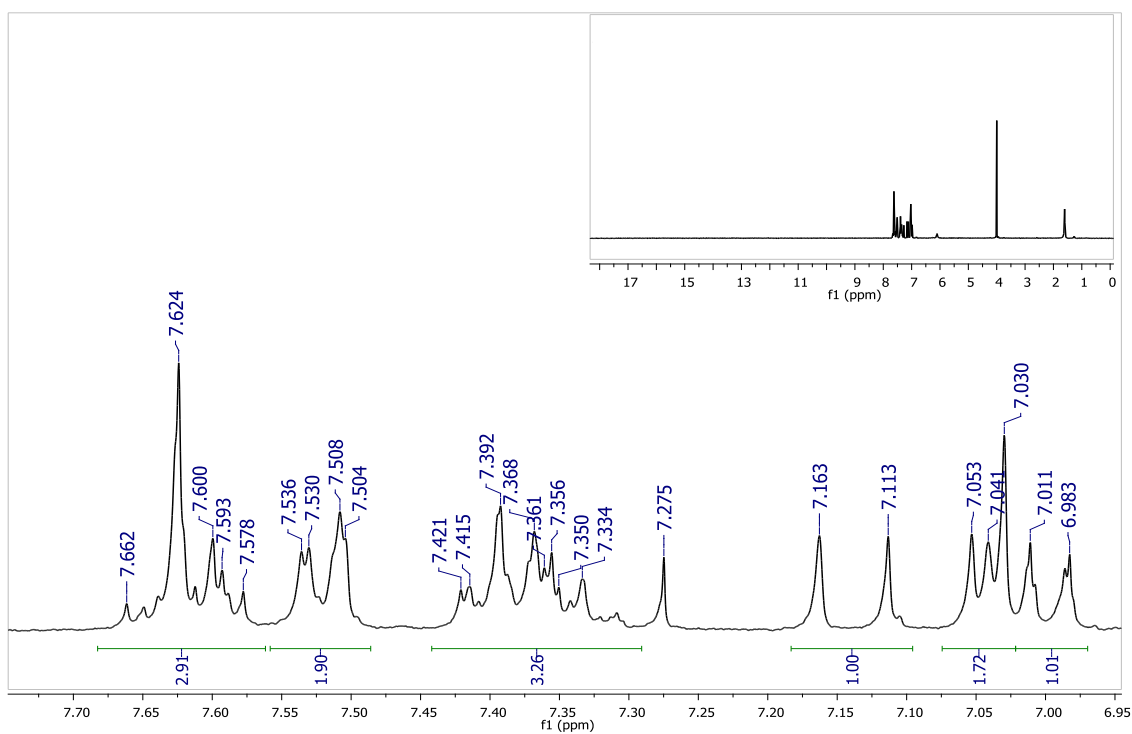

423

424

425

426 **Figure S8. ii)**  $^{13}\text{C}$  NMR spectrum of cinnamylideneacetophenone **9**

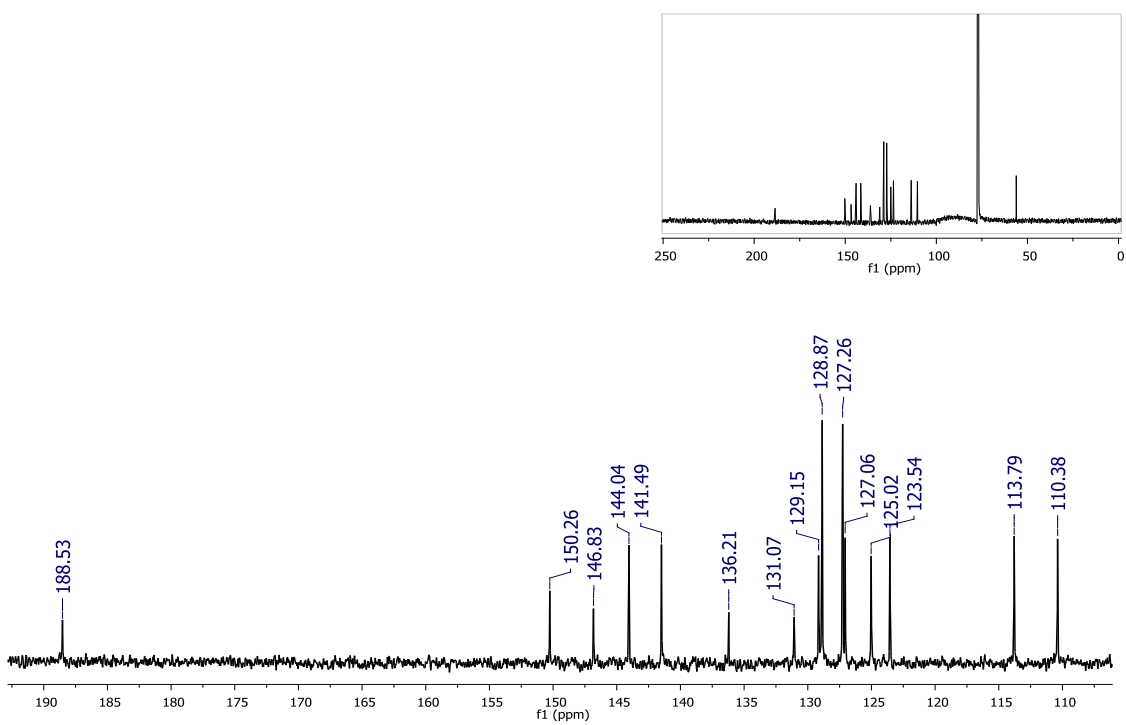

427

428

429 **Figure S8. iii)** UV-Vis spectrum of cinnamylideneacetophenone **9**, MeOH/H<sub>2</sub>O (3:1)

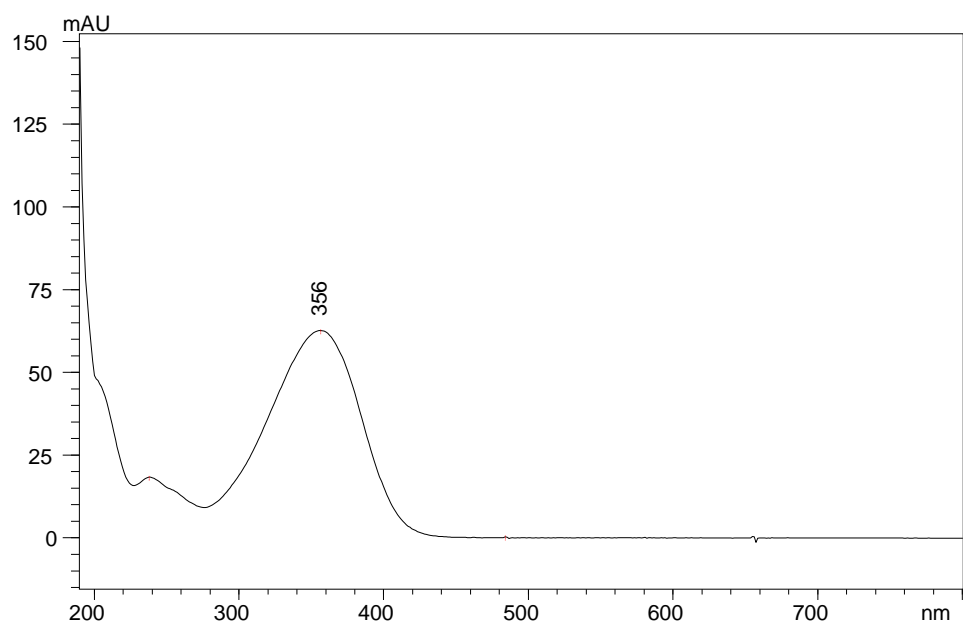

430

431

432

433

434 **Figure S8. iv)** HPLC chromatogram of cinnamylideneacetophenone **9**

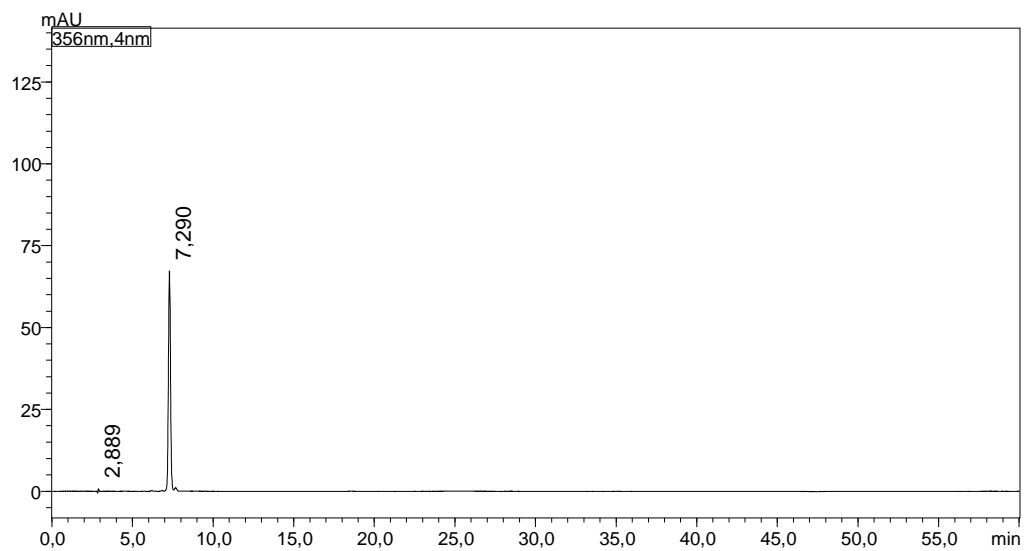

435

436

437

438

439

440

441 **Figure S9. i)**  $^1\text{H}$  NMR spectrum of cinnamylideneacetophenone **10**

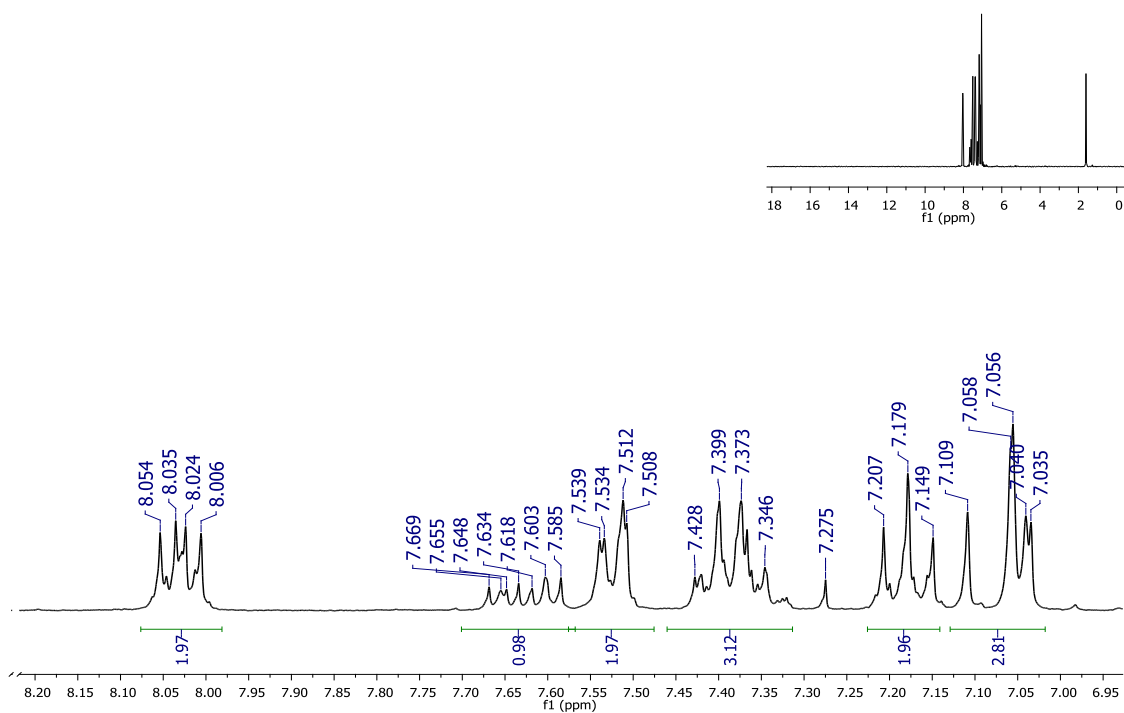

444 **Figure S9. ii)**  $^{13}\text{C}$  NMR spectrum of cinnamylideneacetophenone **10**

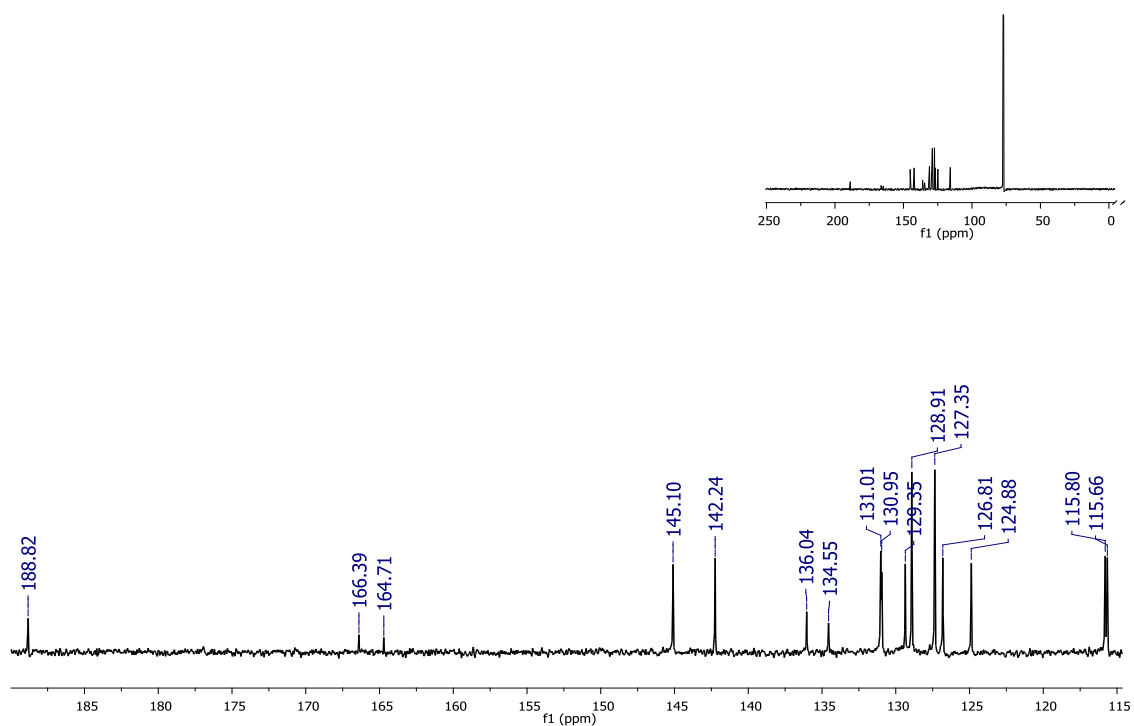

448 **Figure S9.** iii) UV-Vis spectrum of cinnamylideneacetophenone **10**, MeOH/H<sub>2</sub>O (3:1)

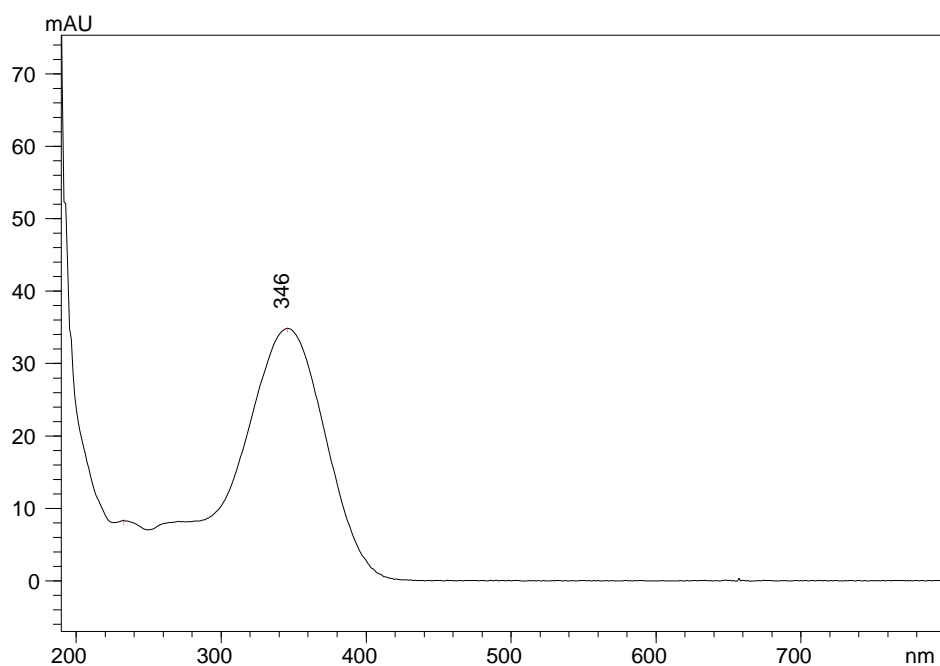

449

450

451

452

453

454 **Figure S9.** iv) HPLC chromatogram of cinnamylideneacetophenone **10**

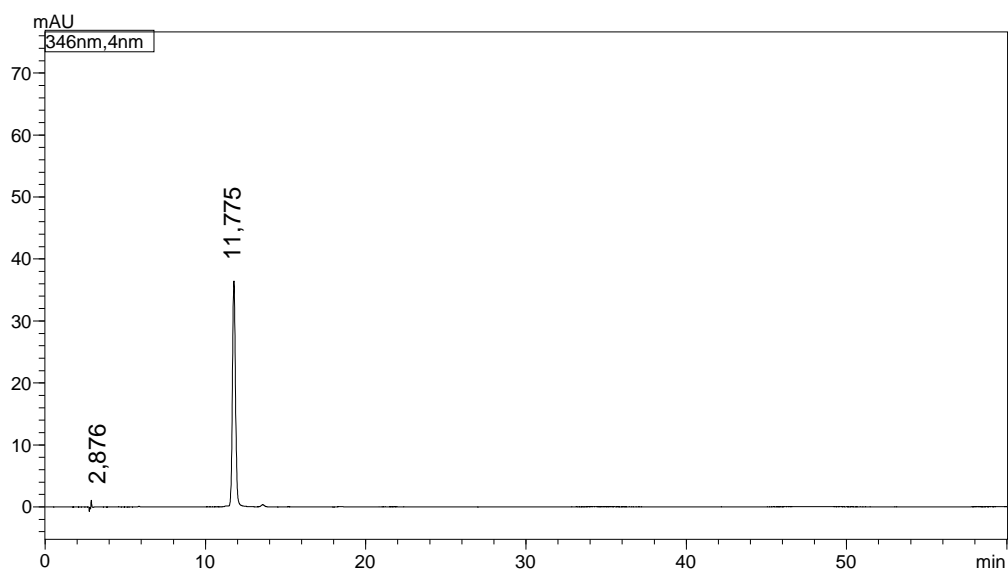

455

456

457

458

459 **Figure S10. i)**  $^1\text{H}$  NMR spectrum of cinnamylideneacetophenone **11**

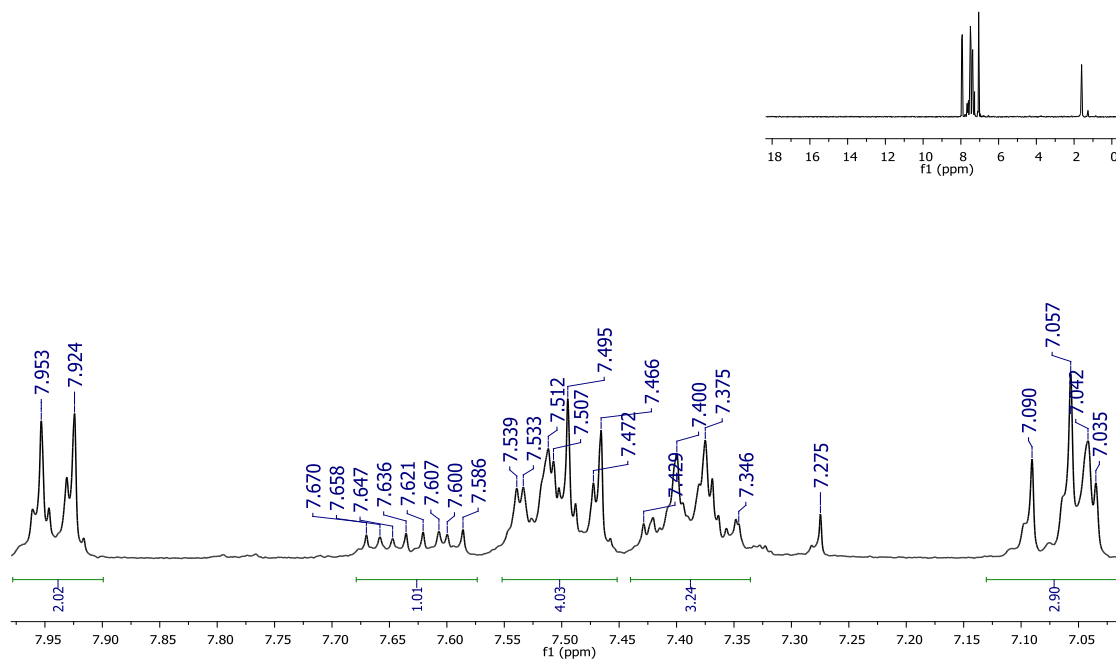

460

461

462

463 **Figure S10. ii)**  $^{13}\text{C}$  NMR spectrum of cinnamylideneacetophenone **11**

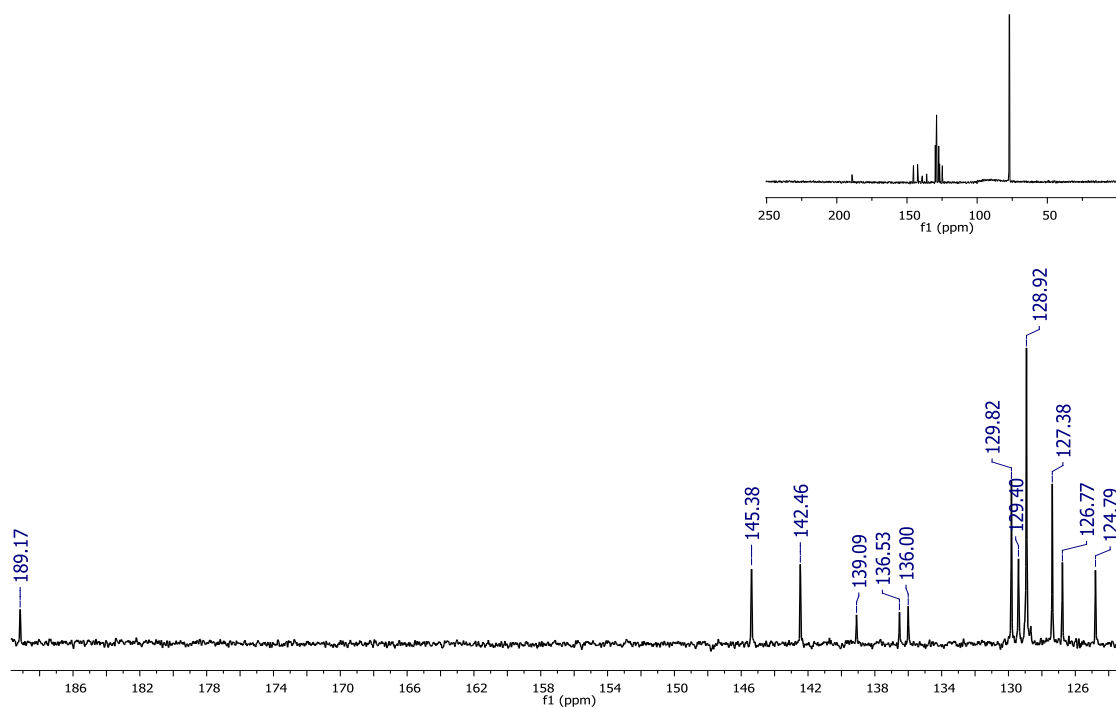

464

465

466

467



468 **Figure S10. iii)** UV-Vis spectrum of cinnamylideneacetophenone **11**, MeOH/H<sub>2</sub>O (3:1)

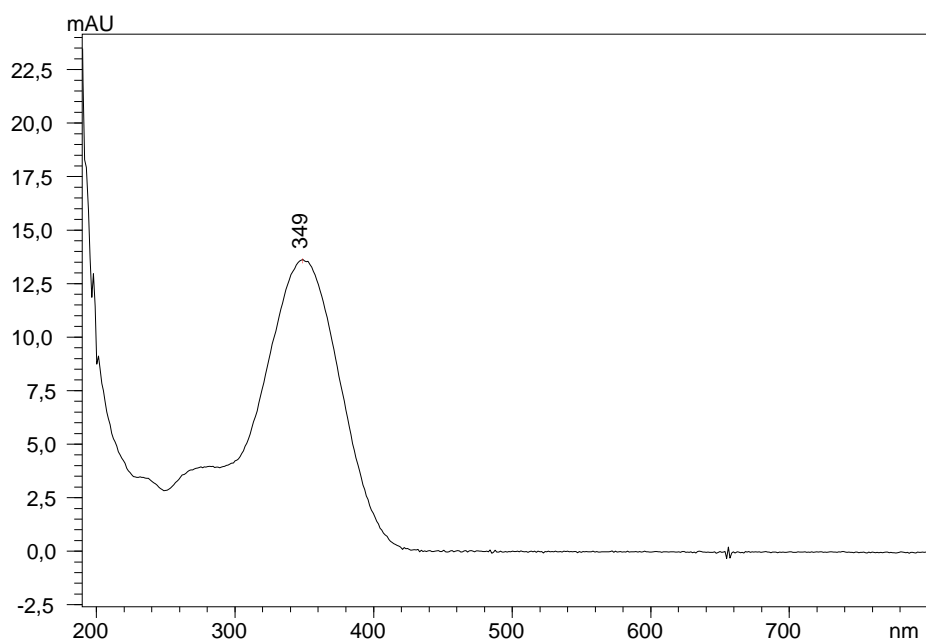

469

470

471

472

473 **Figure S10. iv)** HPLC chromatogram of cinnamylideneacetophenone **11**

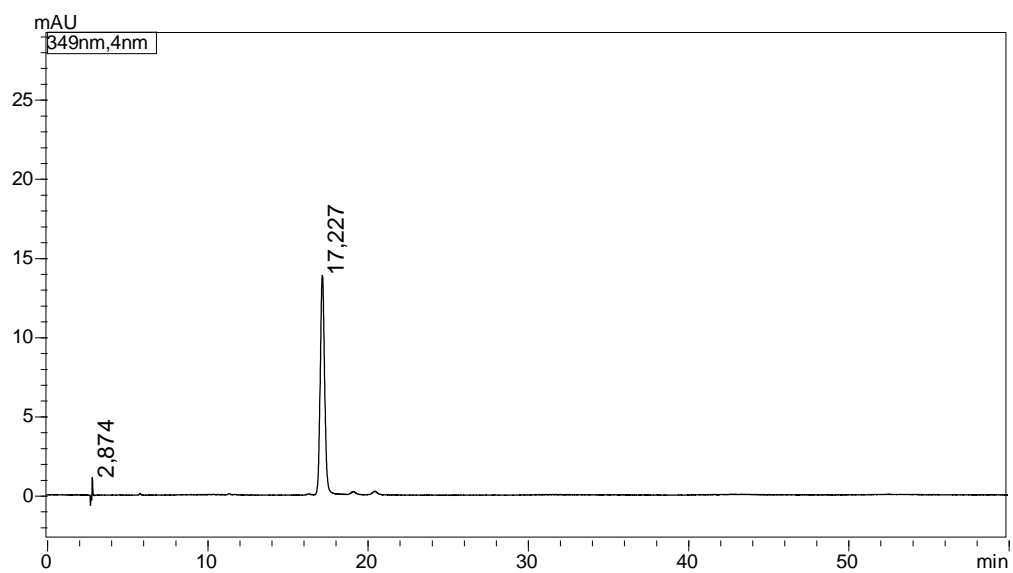

474

475

476

477

478

479

480 **Figure S11. i)**  $^1\text{H}$  NMR spectrum of cinnamylideneacetophenone **12**

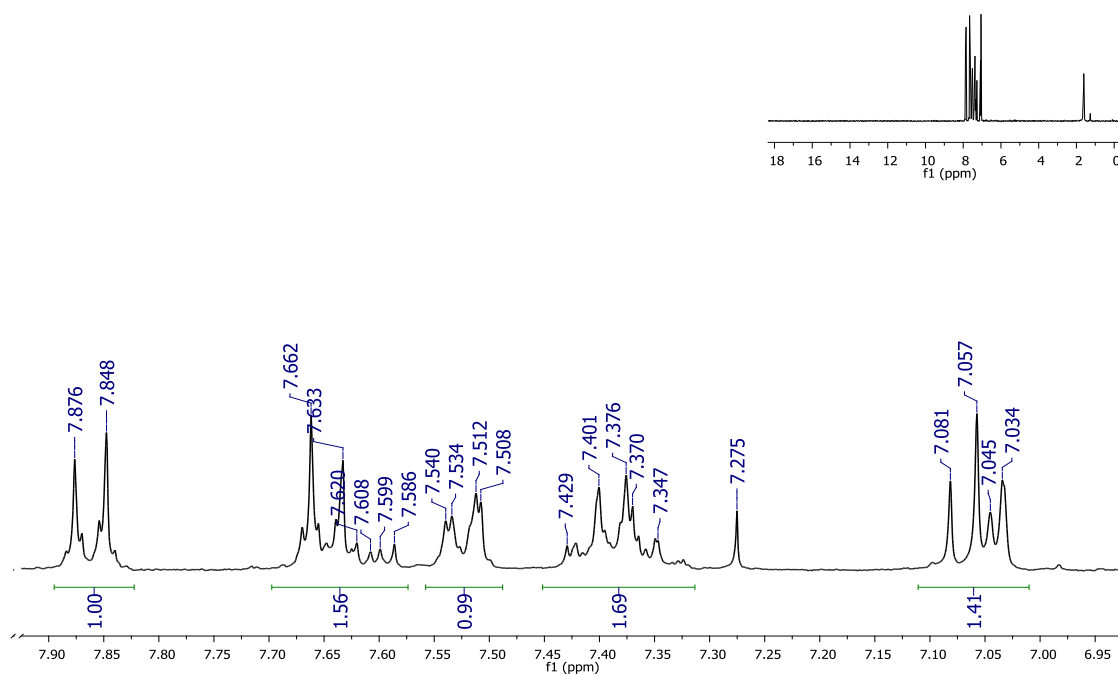

484 **Figure S11. ii)**  $^{13}\text{C}$  NMR spectrum of cinnamylideneacetophenone **12**

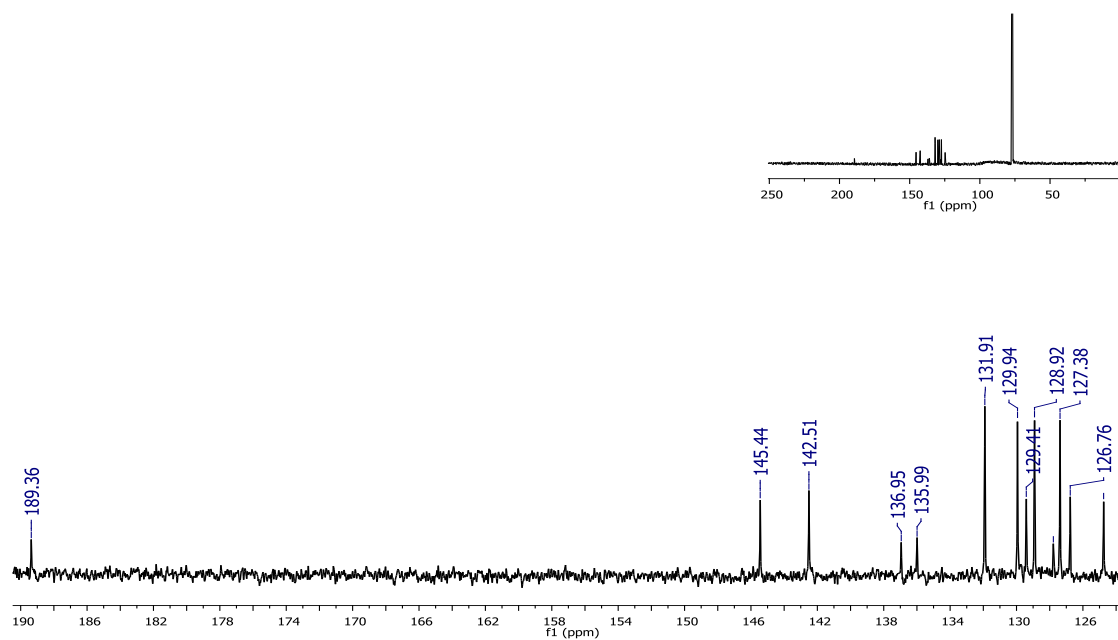

489 **Figure S11. iii)** UV-Vis spectrum of cinnamylideneacetophenone **12**, MeOH/H<sub>2</sub>O (3:1)

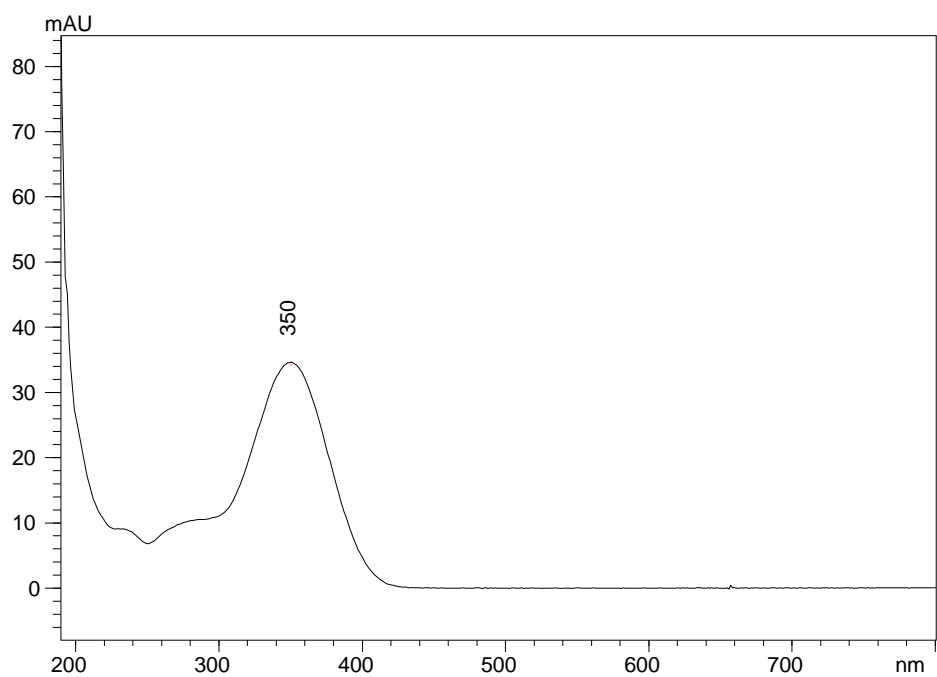

490

491

492

493

494 **Figure S11. iv)** HPLC chromatogram of cinnamylideneacetophenone **12**

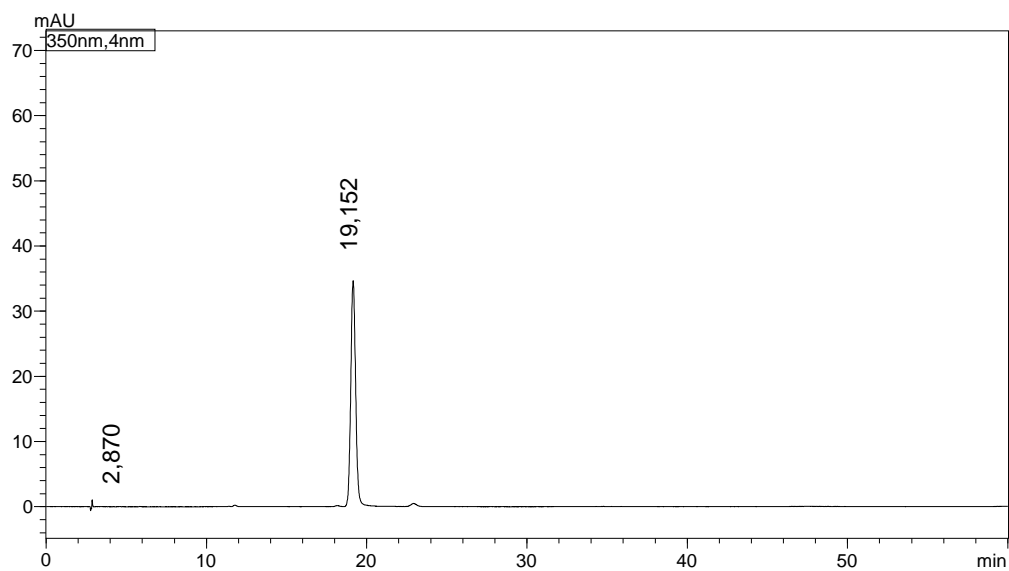

495

496

497

498

499

500 **Figure S12. i)**  $^1\text{H}$  NMR spectrum of cinnamylideneacetophenone **13**

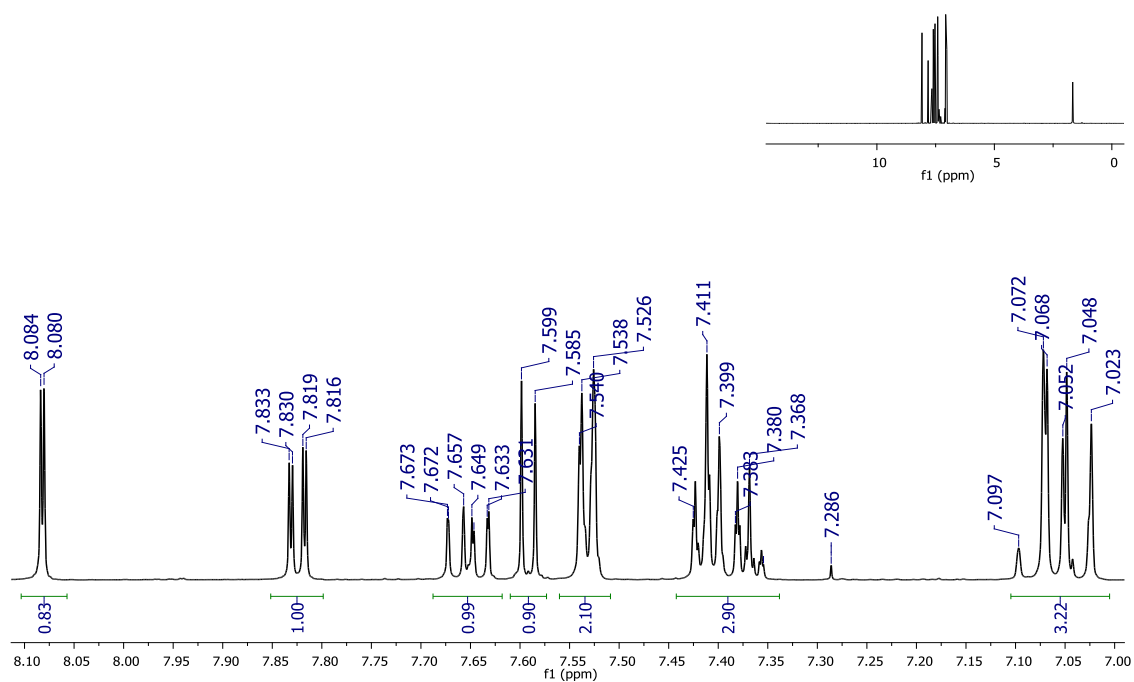

504 **Figure S12. ii)**  $^{13}\text{C}$  NMR spectrum of cinnamylideneacetophenone **13**

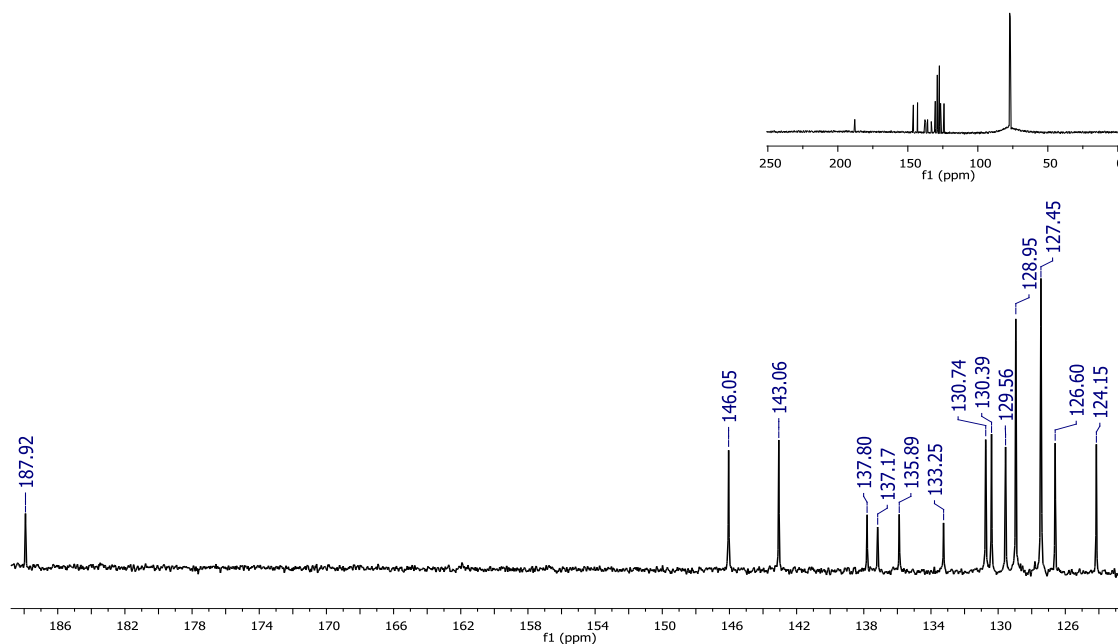

508 **Figure S12. iii)** UV-Vis spectrum of cinnamylideneacetophenone **13**, MeOH/H<sub>2</sub>O (3:1)

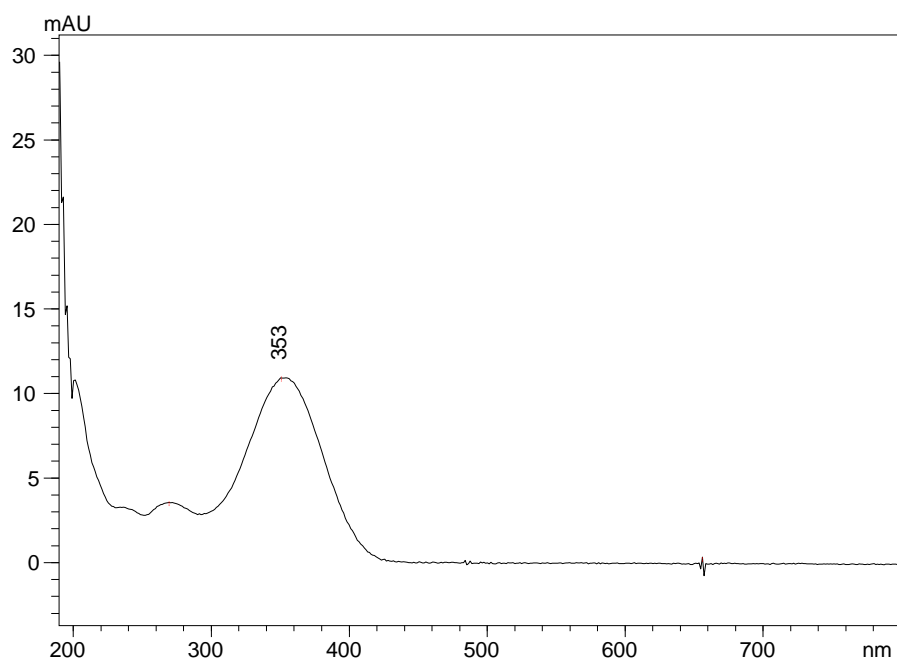

509

510

511

512

513 **Figure S12. iv)** HPLC chromatogram of cinnamylideneacetophenone **13**

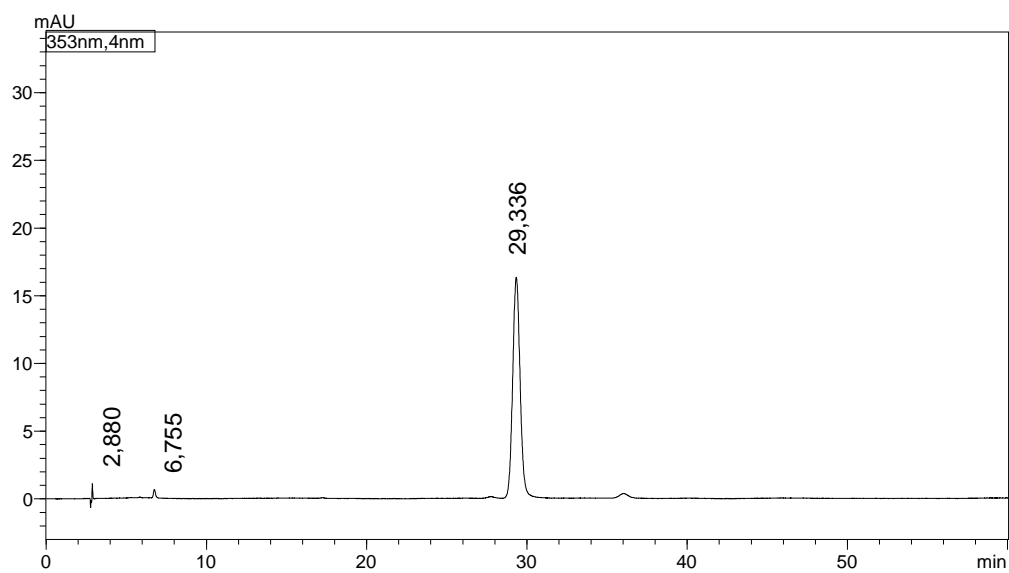

514

515

516

517

518

519 **Figure S13. i)**  $^1\text{H}$  NMR spectrum of cinnamylideneacetophenone **14**

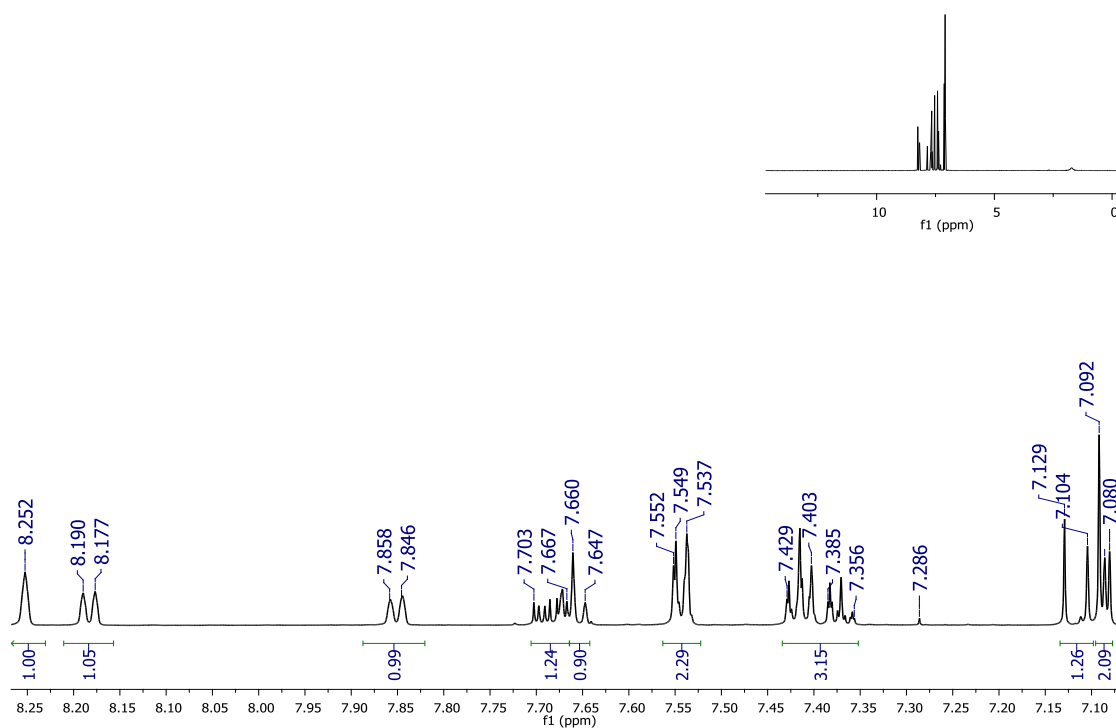

520

521

522 **Figure S13. ii)**  $^{13}\text{C}$  NMR spectrum of cinnamylideneacetophenone **14**

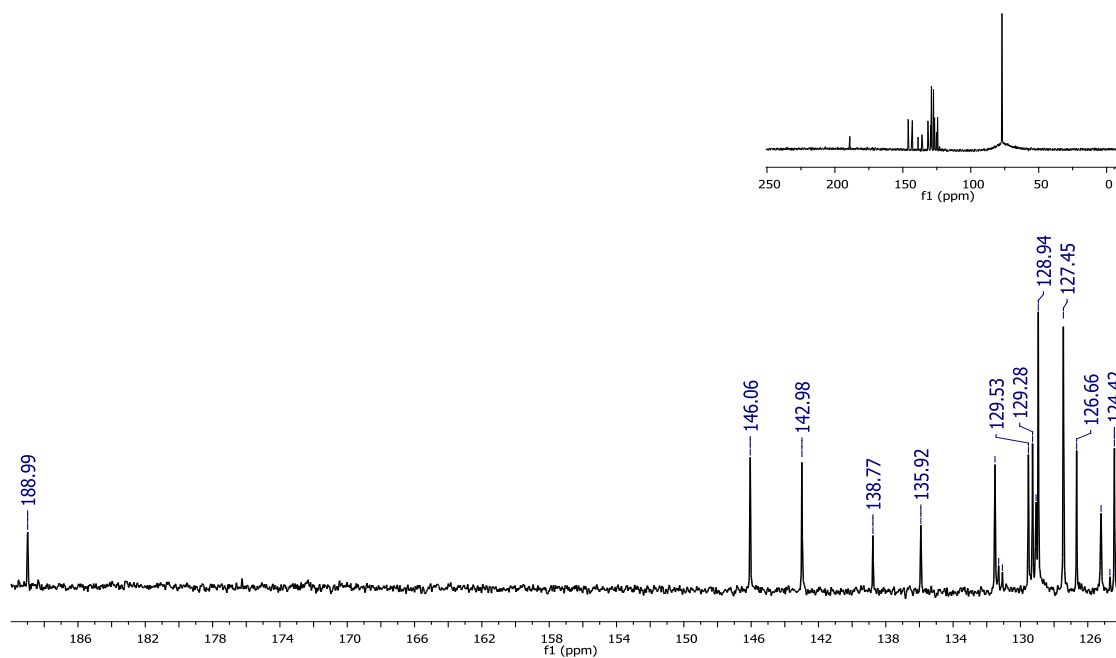

523

524

525

526

527 **Figure S13. iii)** UV-Vis spectrum of cinnamylideneacetophenone **14**, MeOH/H<sub>2</sub>O (3:1)

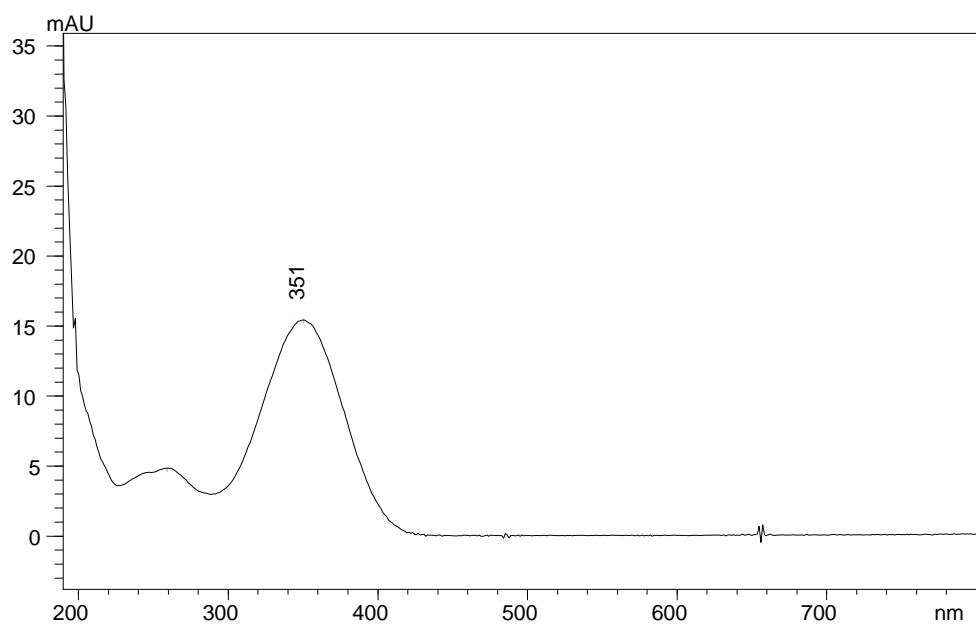

528

529

530

531

532

533 **Figure S13. iv)** HPLC chromatogram of cinnamylideneacetophenone **14**

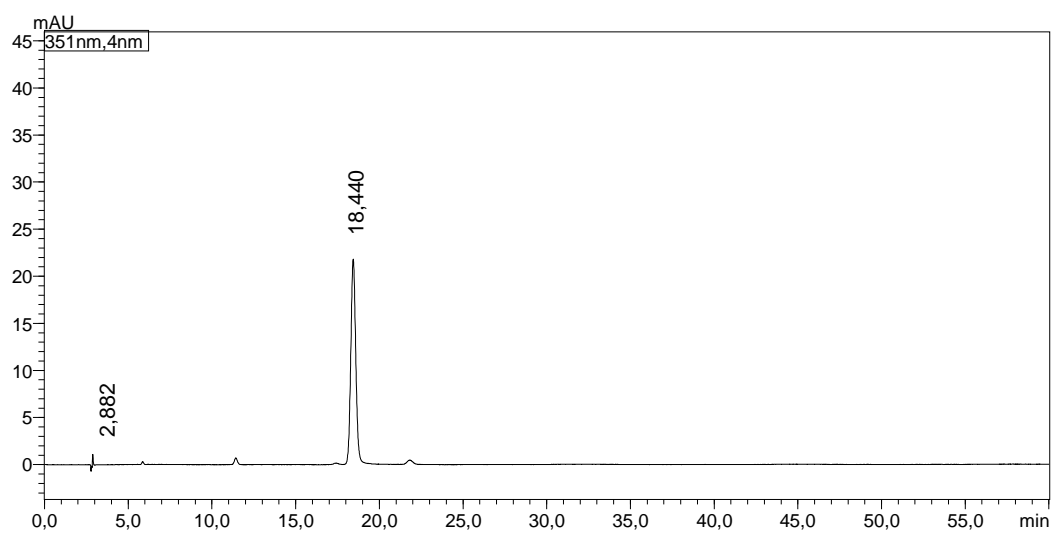

534

535

536

537

538

539 **Figure S14. i)**  $^1\text{H}$  NMR spectrum of cinnamylideneacetophenone **15**

540

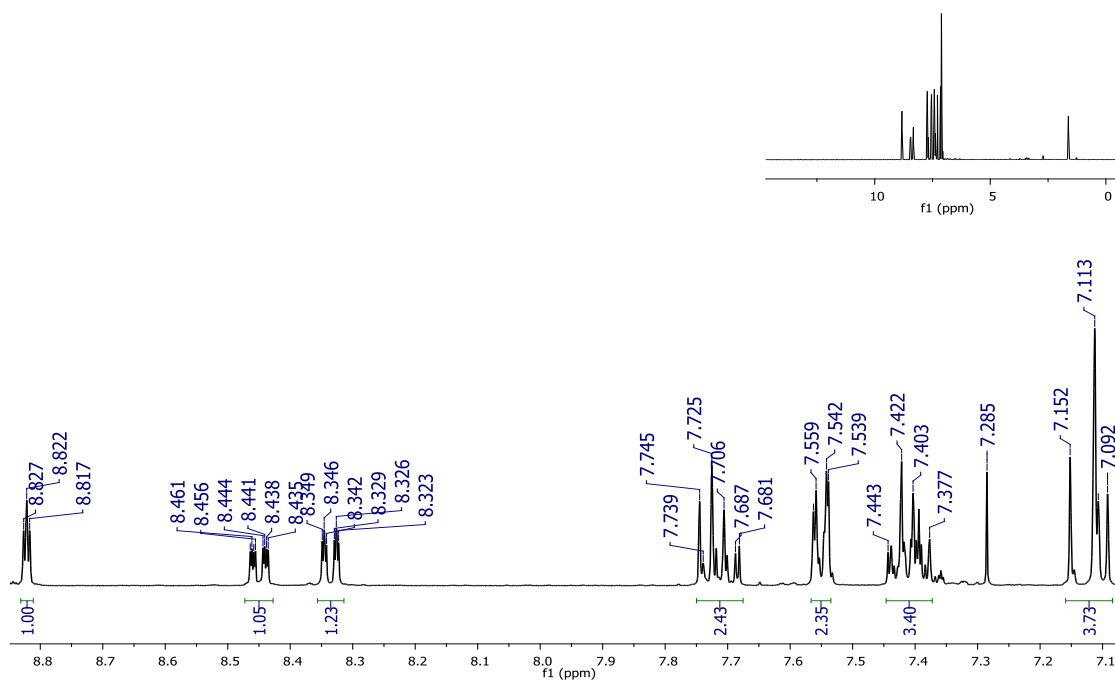

541

542

543

544

545 **Figure S14. ii)**  $^{13}\text{C}$  NMR spectrum of cinnamylideneacetophenone **15**

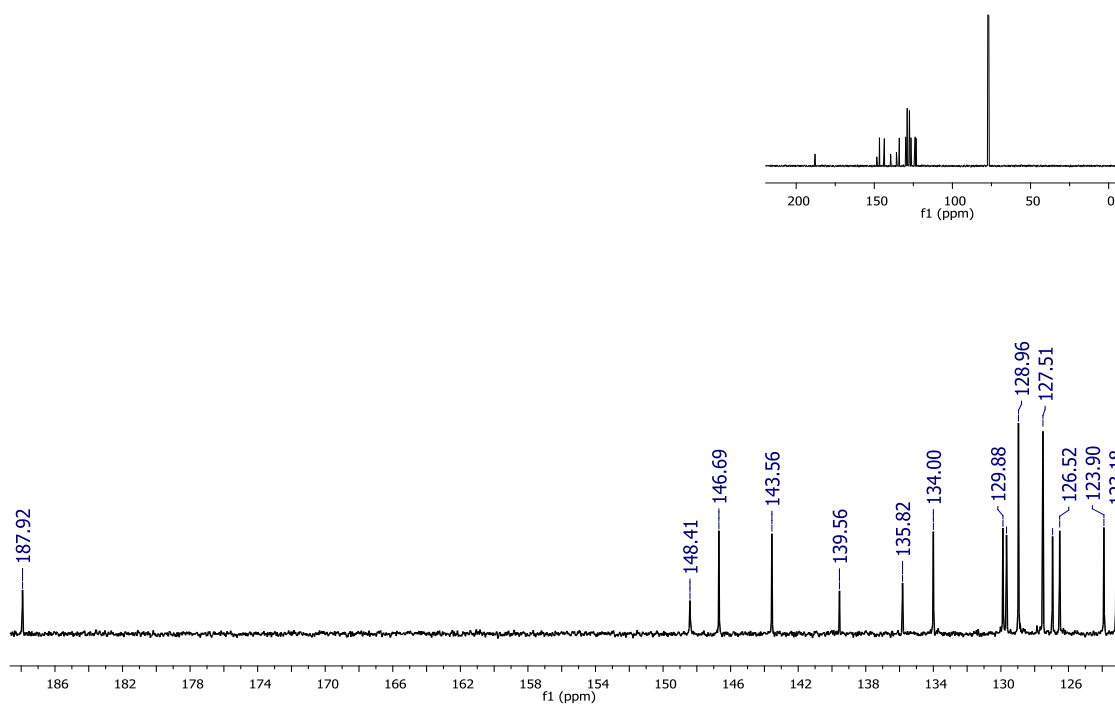

546

547



548

549 **Figure S14. iii)** UV-Vis spectrum of cinnamylideneacetophenone **15**, MeOH/H<sub>2</sub>O (3:1)

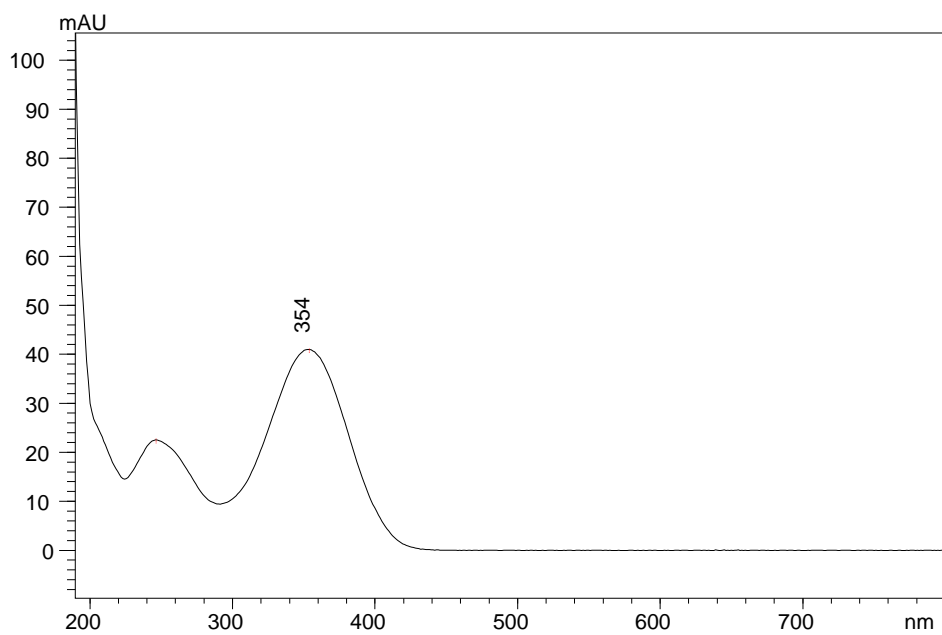

550

551

552

553

554

555 **Figure S14. iv)** HPLC chromatogram of cinnamylideneacetophenone **15**

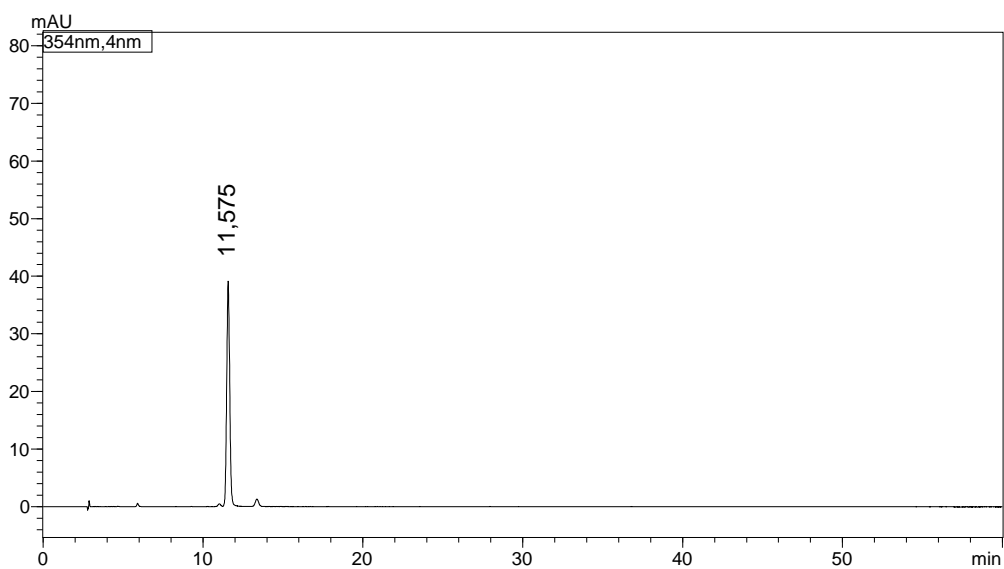

556

557

558

559 **Figure S15. i)**  $^1\text{H}$  NMR spectrum of cinnamylideneacetophenone **16**

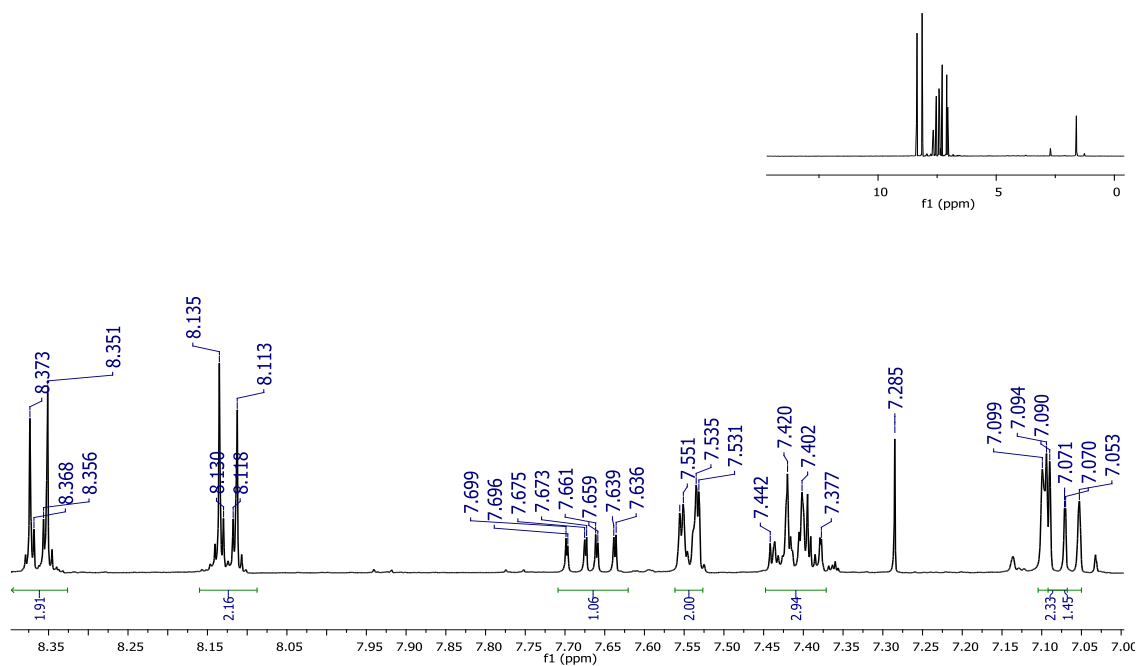

563 **Figure S15. ii)**  $^{13}\text{C}$  NMR spectrum of cinnamylideneacetophenone **16**

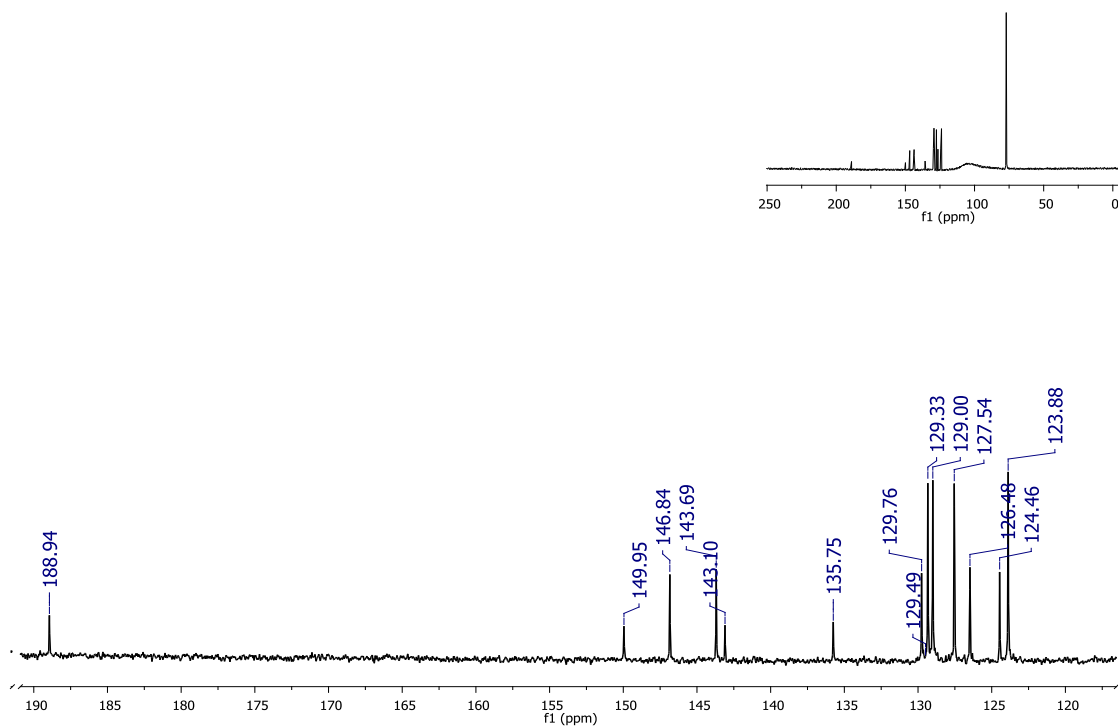

568 **Figure S15. iii)** UV-Vis spectrum of cinnamylideneacetophenone **16**, MeOH/H<sub>2</sub>O (3:1)

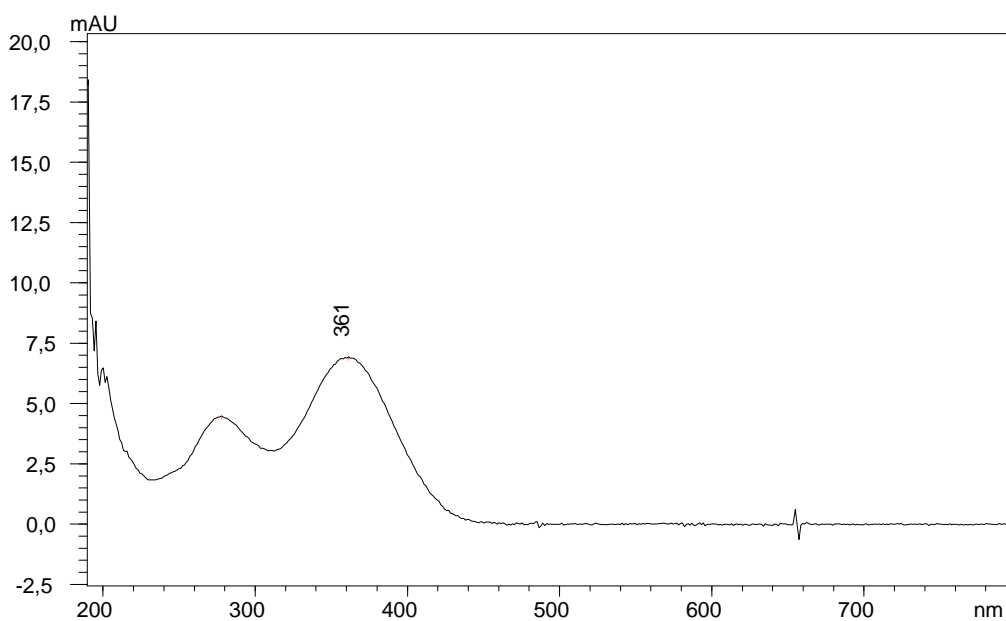

569

570

571

572

573

574 **Figure S15. iv)** HPLC chromatogram of cinnamylideneacetophenone **16**

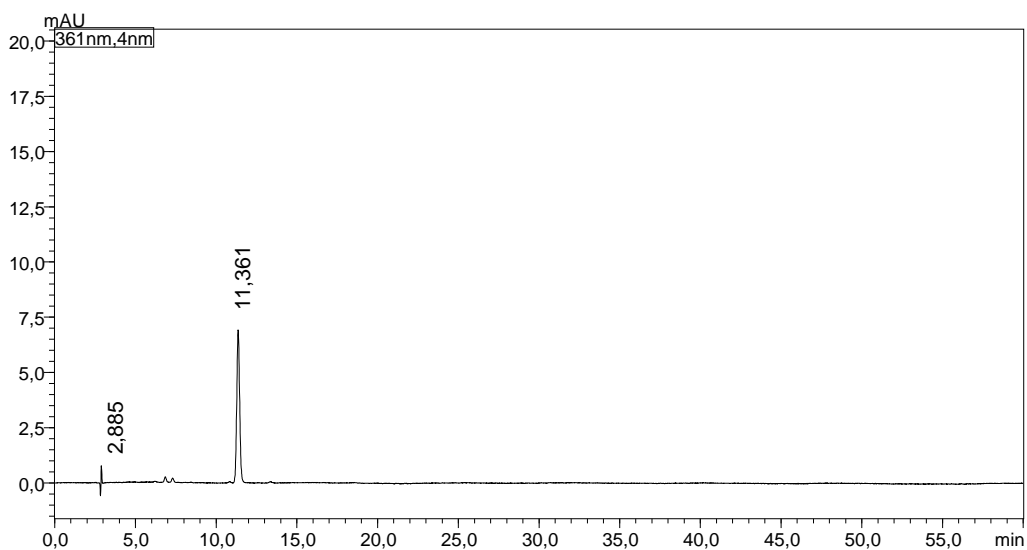

575

576

577

578

579

580 **Figure S16. i)**  $^1\text{H}$  NMR spectrum of cinnamylideneacetophenone **17**

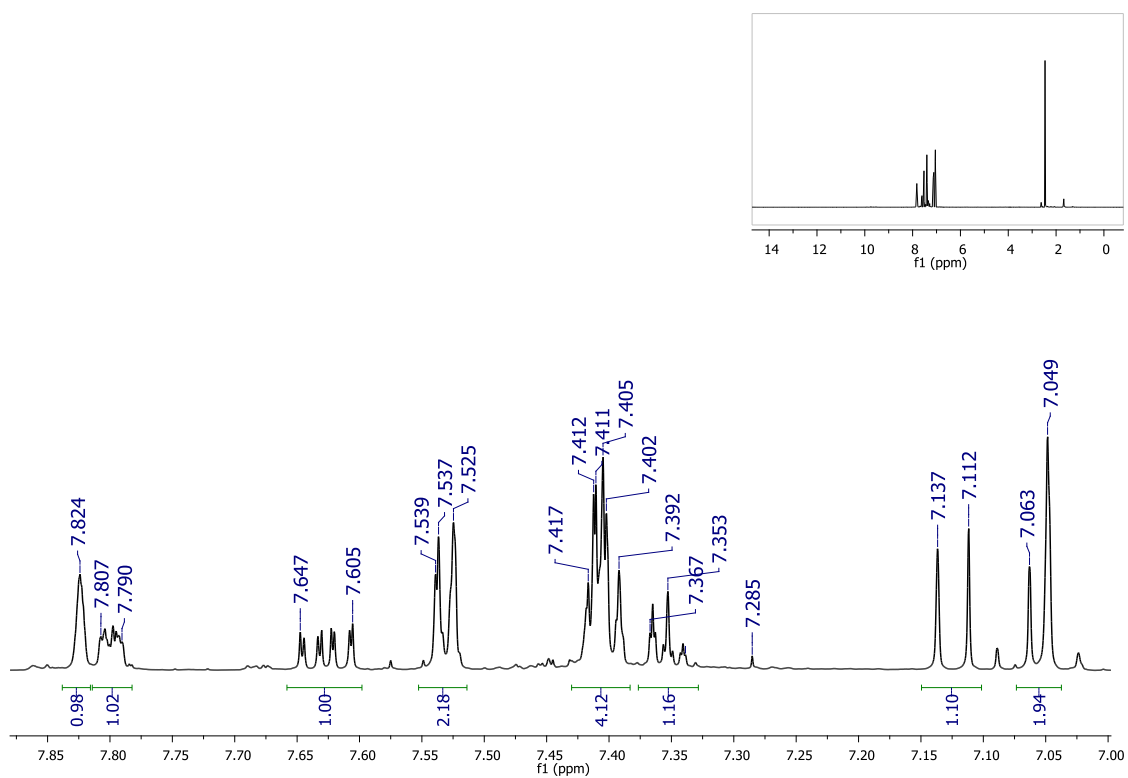

581

582

583 **Figure S16. ii)**  $^{13}\text{C}$  NMR spectrum of cinnamylideneacetophenone **17**

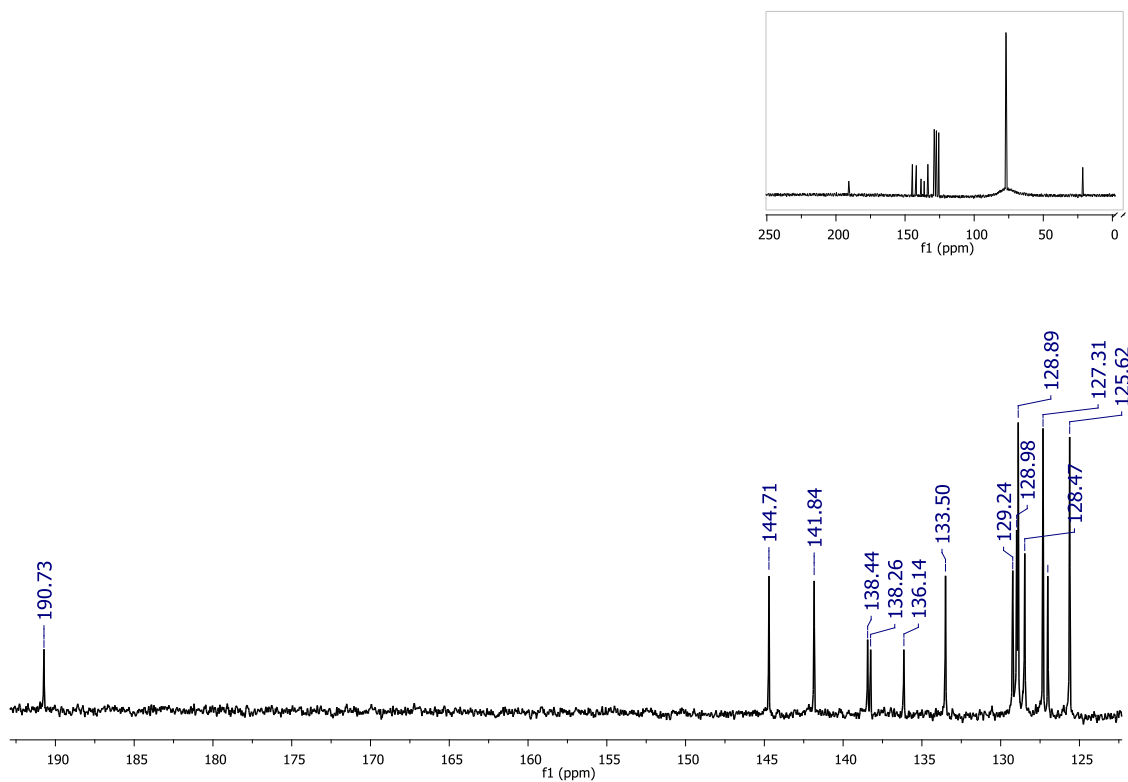

584

585

586 **Figure S16. iii)** UV-Vis spectrum of cinnamylideneacetophenone **17**, MeOH/H<sub>2</sub>O (3:1)

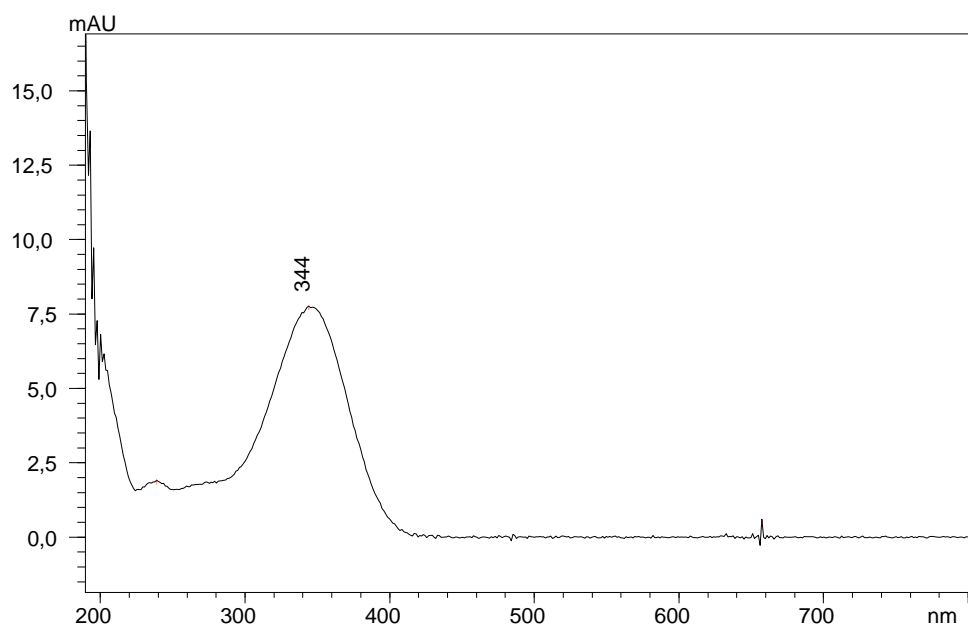

587

588

589

590

591

592 **Figure S16. iv)** HPLC chromatogram of cinnamylideneacetophenone **17**

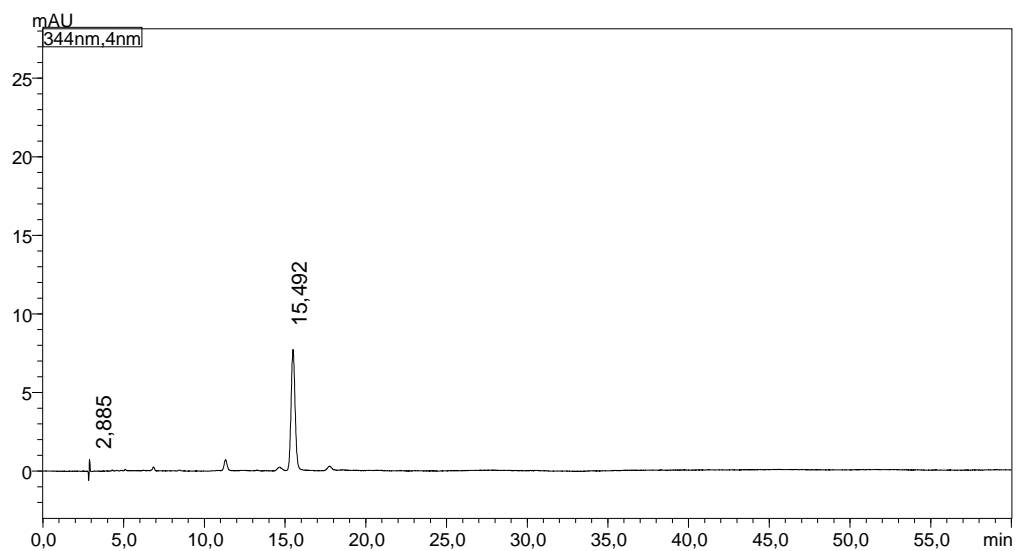

593

594

595

596

597

598 **Figure S17. i)**  $^1\text{H}$  NMR spectrum of cinnamylideneacetophenone **18**

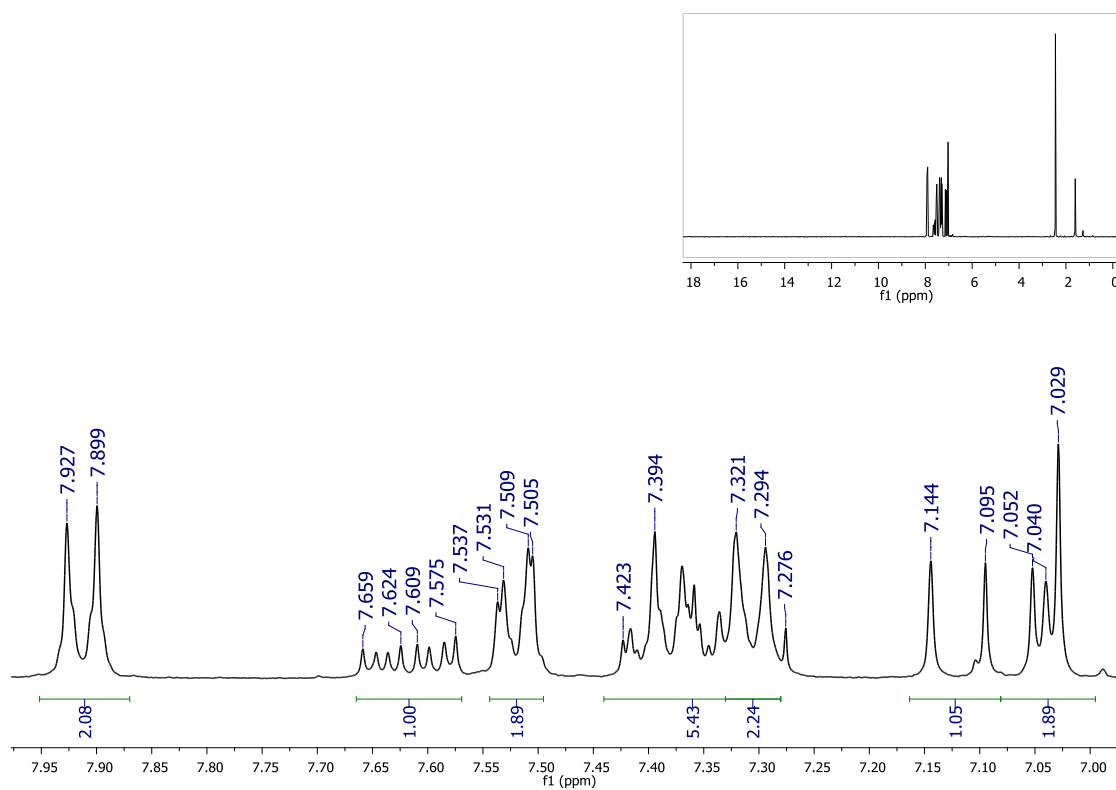

599

600

601 **Figure S17. ii)**  $^{13}\text{C}$  NMR spectrum of cinnamylideneacetophenone **18**

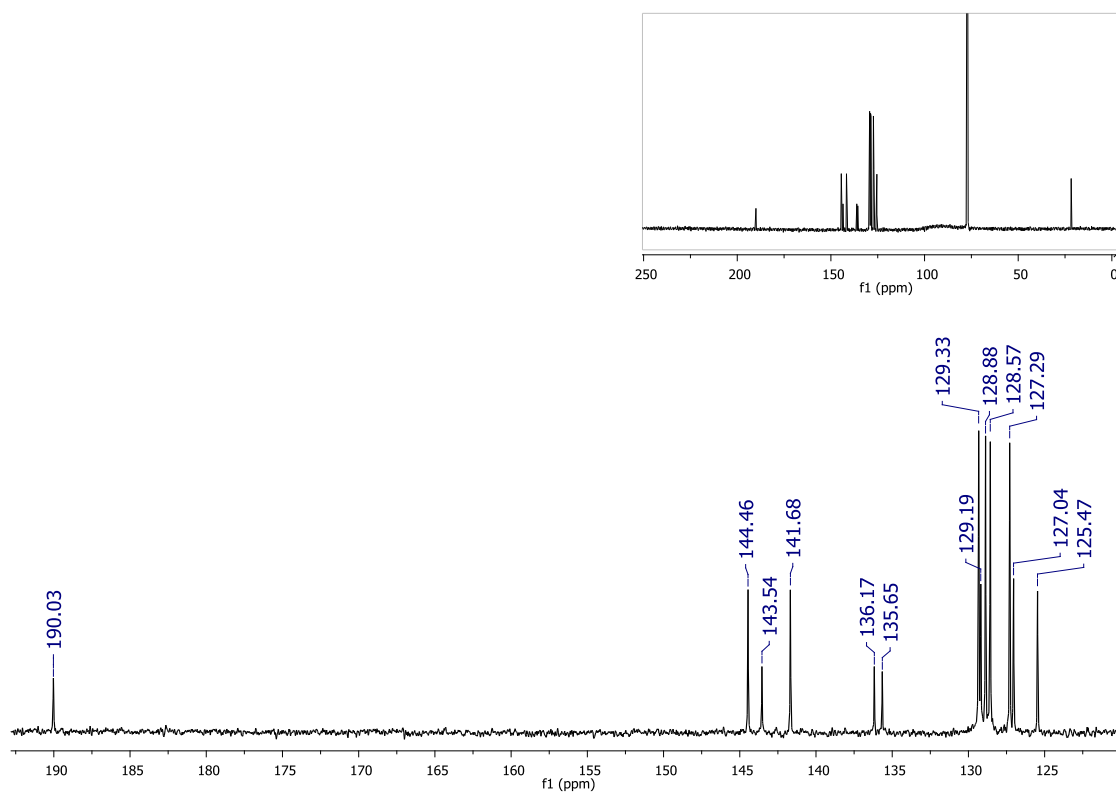

602

603

604 **Figure S17. iii)** UV-Vis spectrum of cinnamylideneacetophenone **18**, MeOH/H<sub>2</sub>O (3:1)

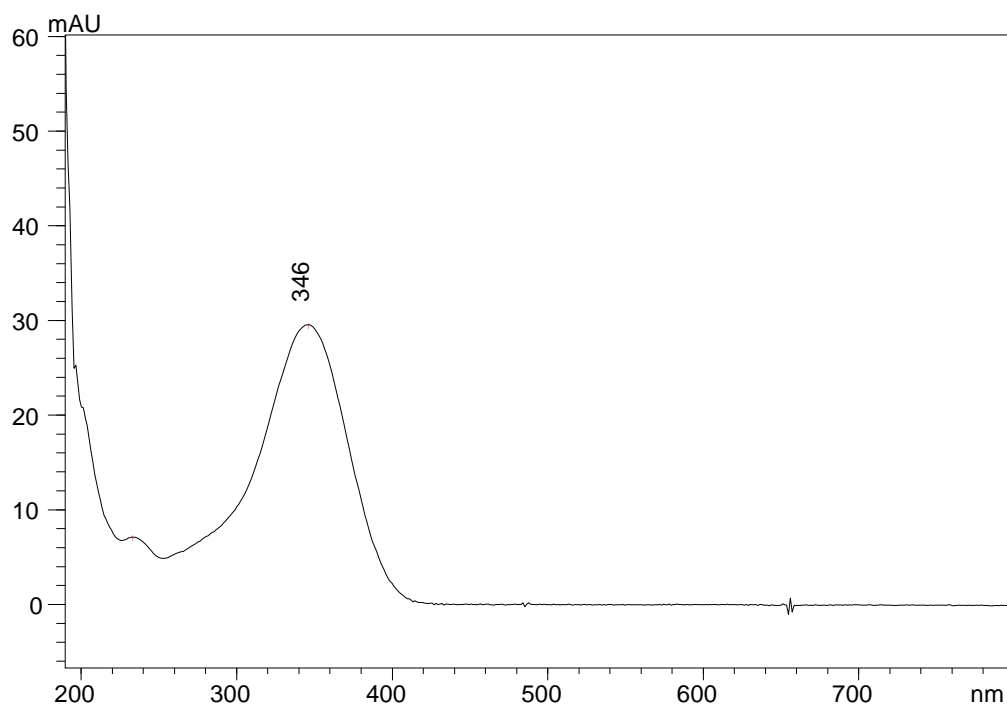

605

606

607

608

609 **Figure S17. iv)** HPLC chromatogram of cinnamylideneacetophenone **18**

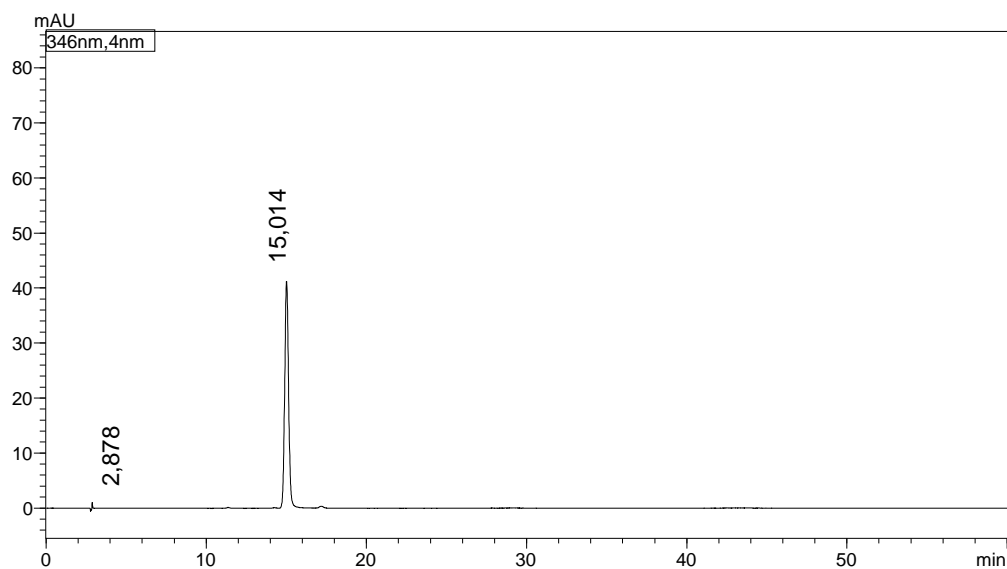

610
